# Supplementary material for: Spirocyclic Drimanes from the Marine Fungus Stachybotrys sp. Strain MF347
Source: MDPI journal article supplement (doi:10.3390/md12041924), 2014-04-01
Supplement: s1 [file s1]

# Supplementary Information

Figure S1.  $^1\text{H}$  NMR in  $\text{CD}_3\text{OD}$  for compound **1**.

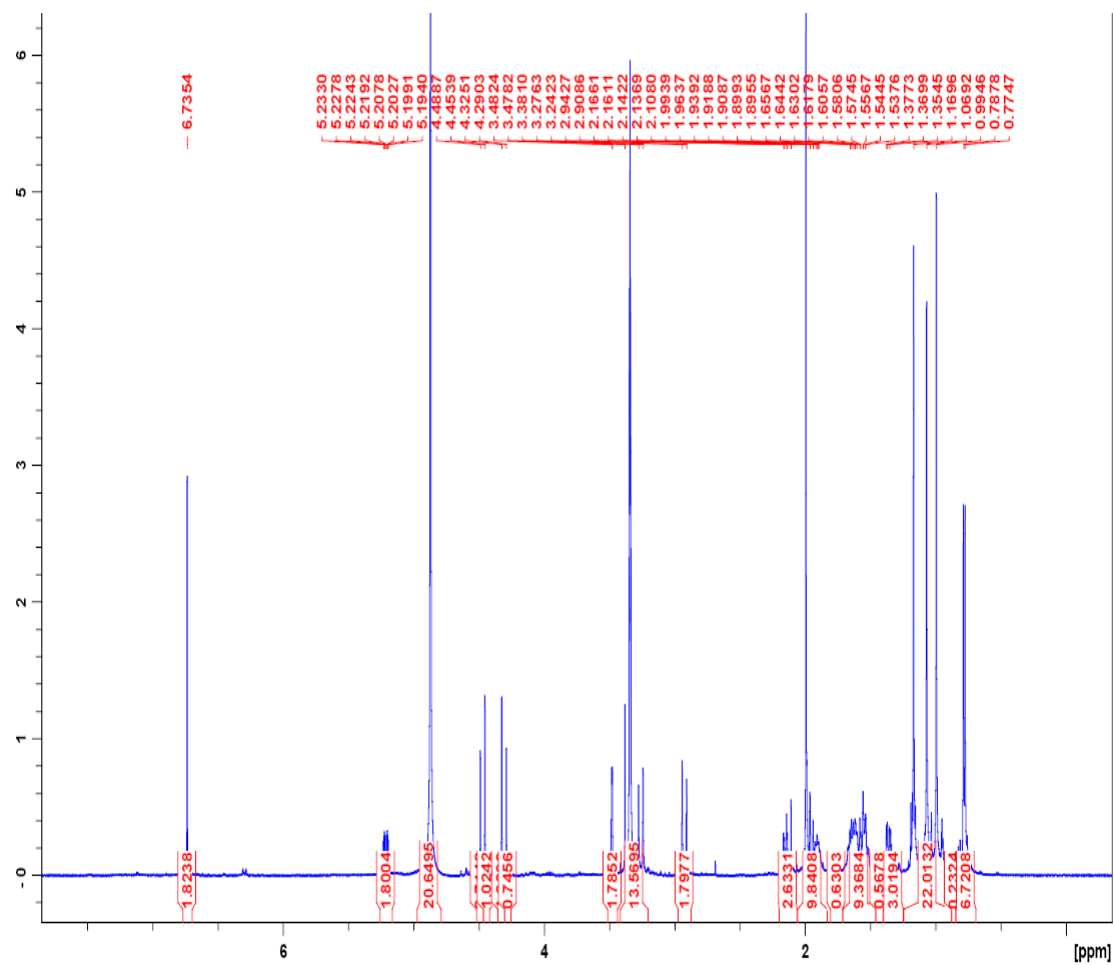

**Figure S2.**  $^1\text{H}$  NMR-2 in  $\text{CD}_3\text{OD}$  for compound 1.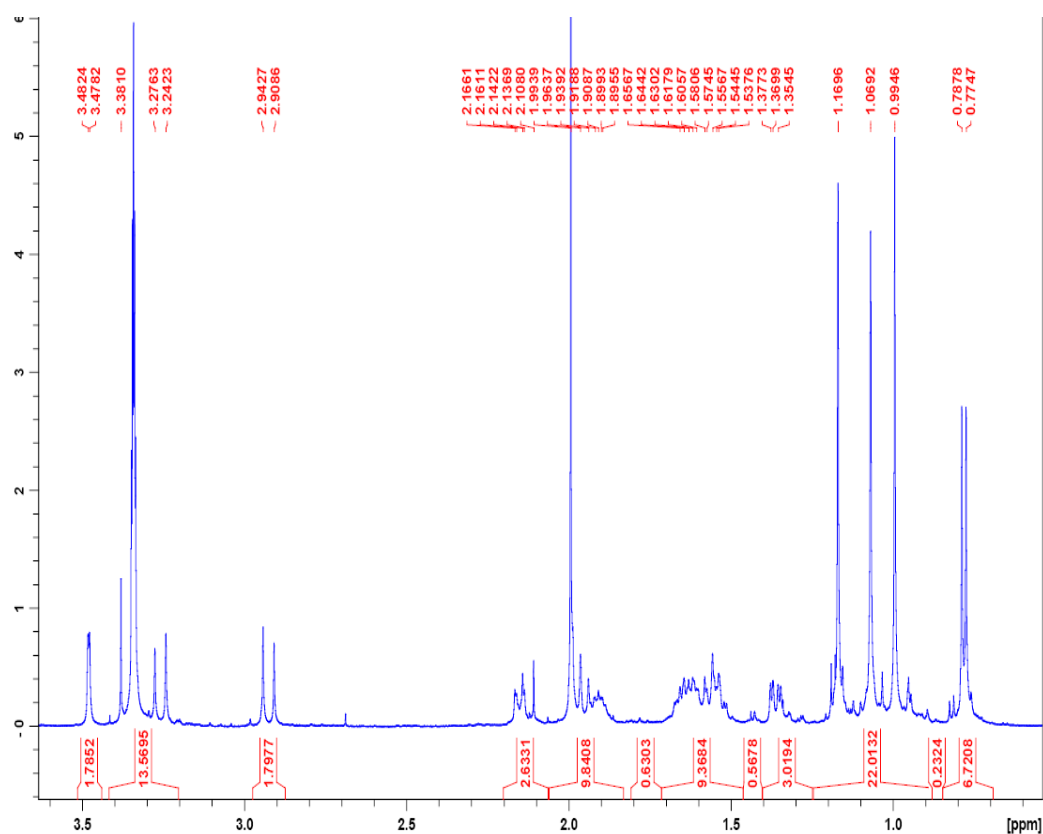**Figure S3.**  $^{13}\text{C}$  NMR in  $\text{CD}_3\text{OD}$  for compound 1.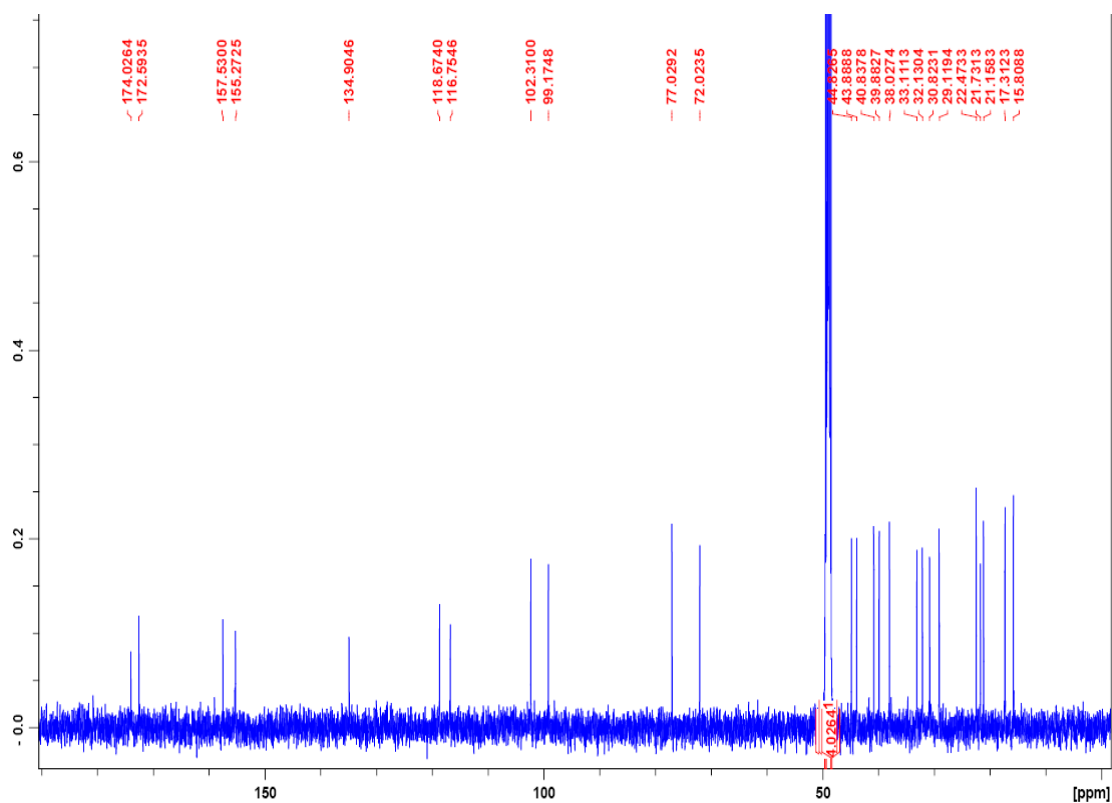

**Figure S4.** COSY in CD<sub>3</sub>OD for compound 1.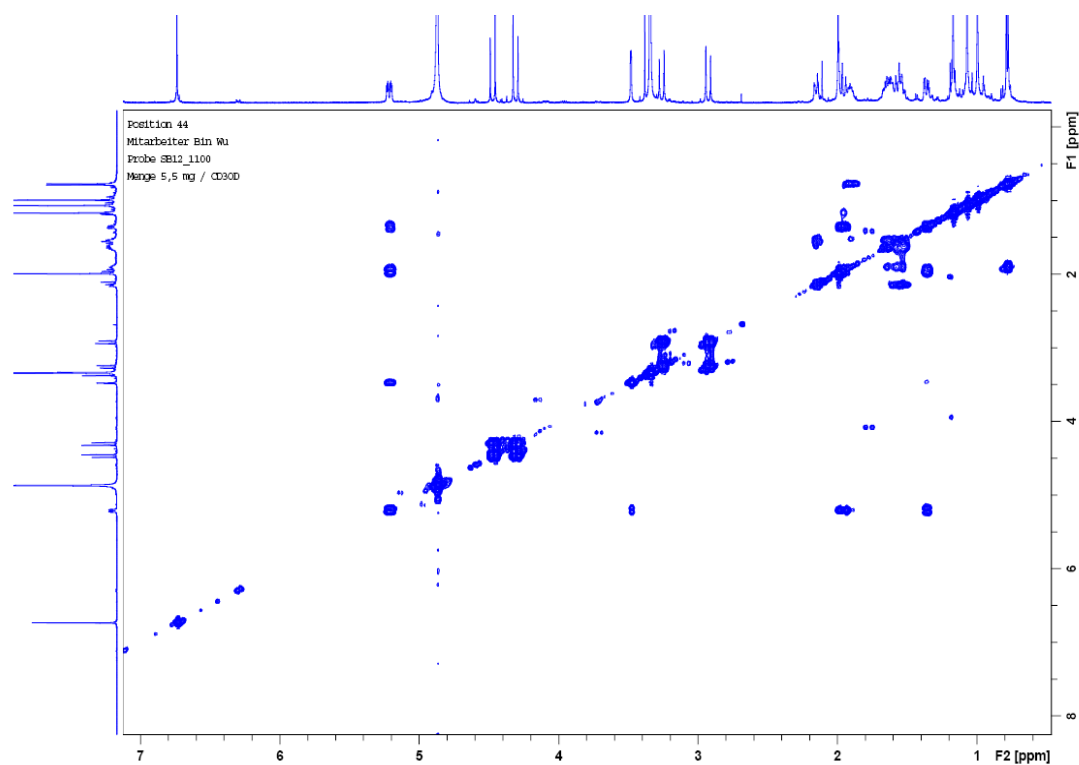**Figure S5.** COSY-2 in CD<sub>3</sub>OD for compound 1.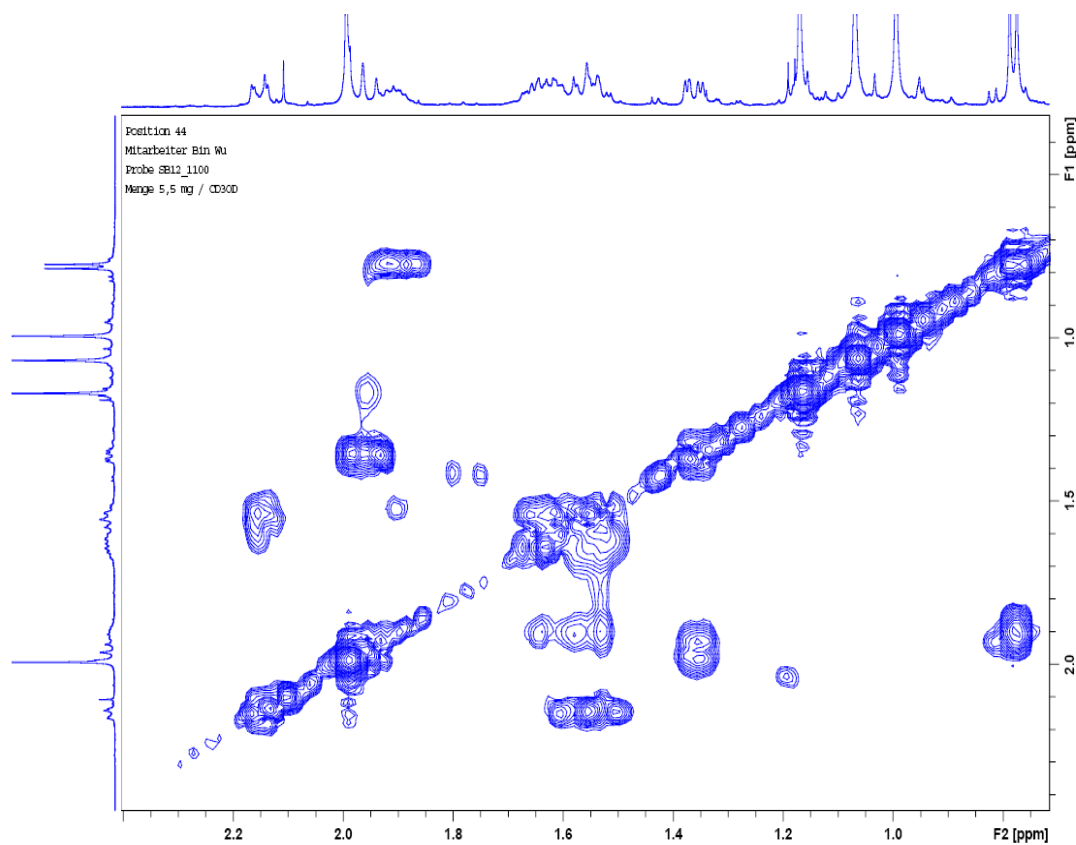

**Figure S6.** HSQC in CD<sub>3</sub>OD for compound **1**.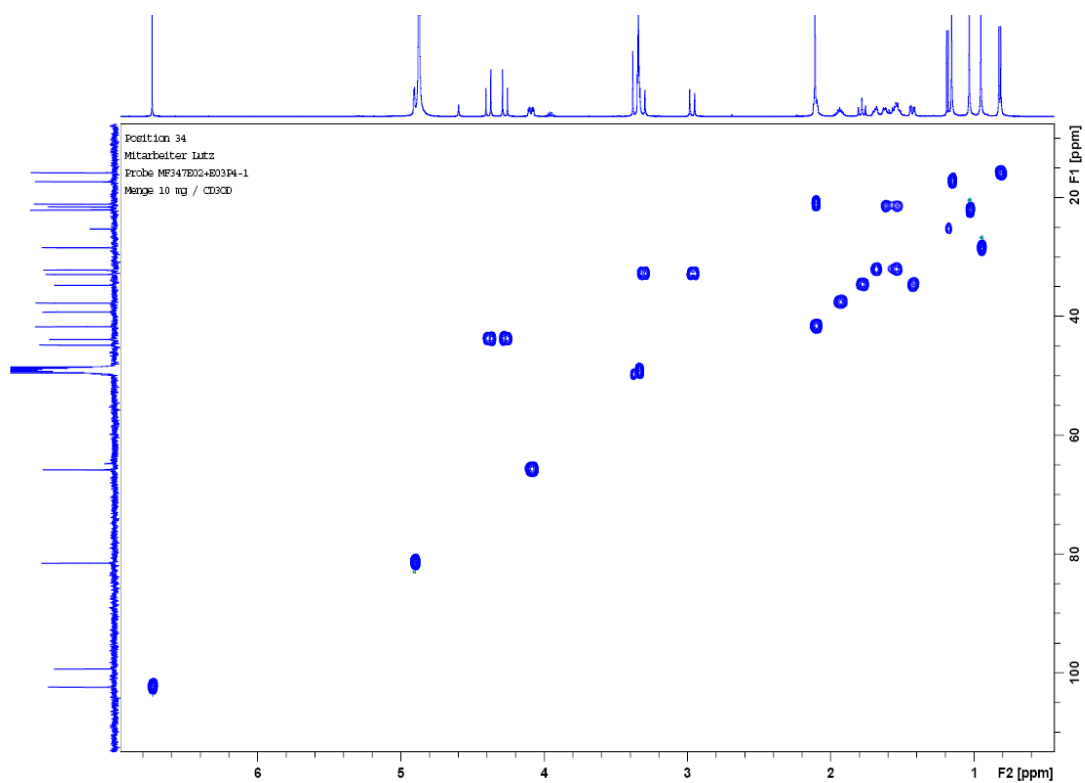**Figure S7.** HMBC in CD<sub>3</sub>OD for compound **1**.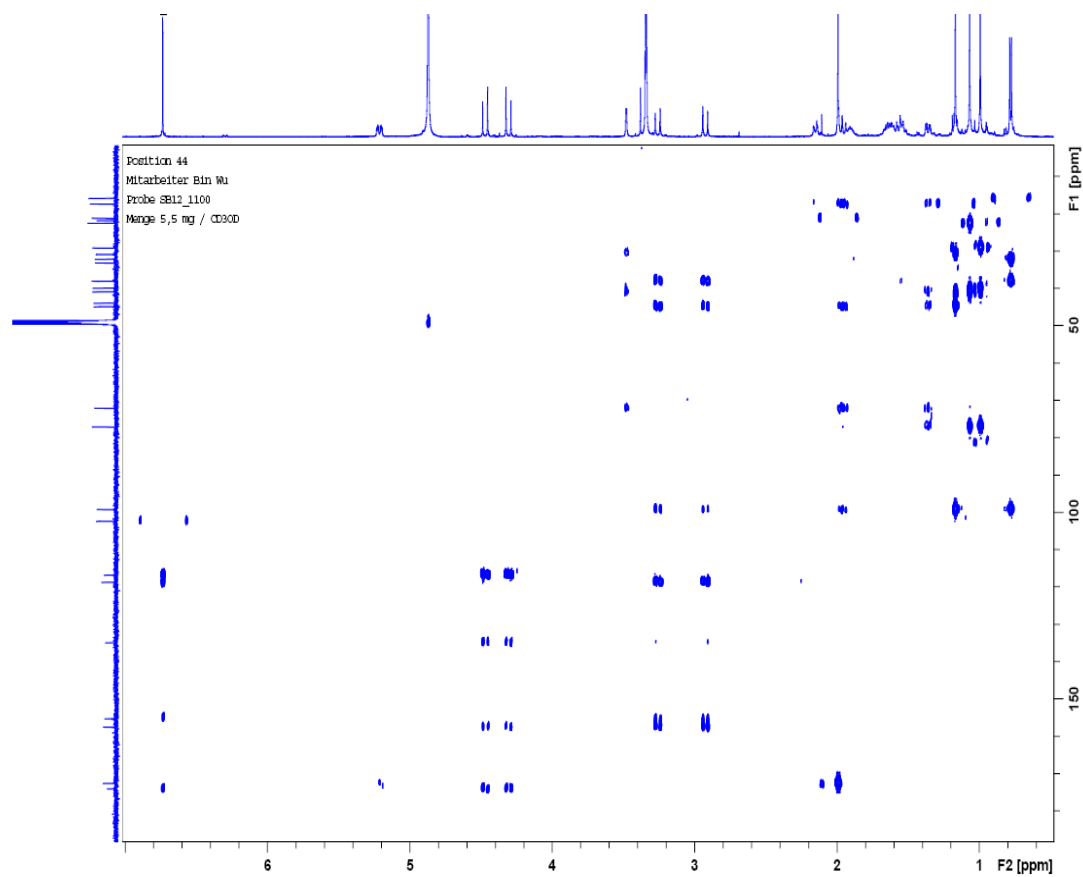

**Figure S8.** HMBC-2 in CD<sub>3</sub>OD for compound **1**.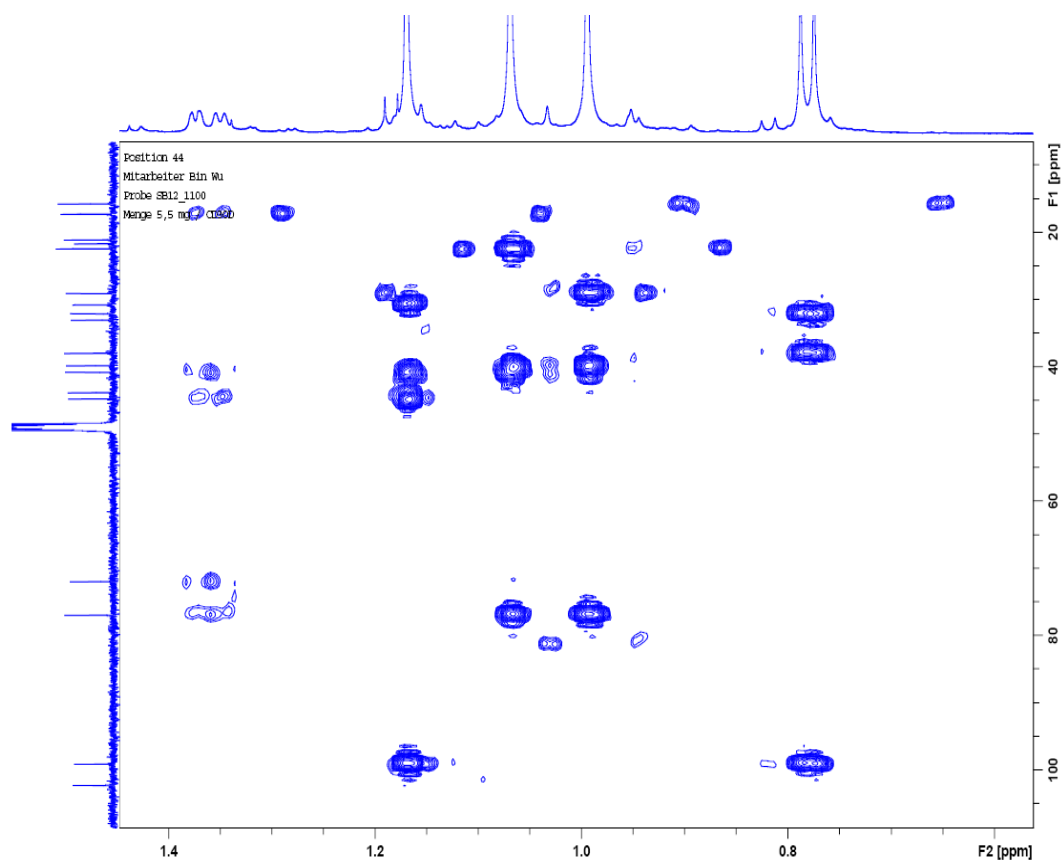**Figure S9.** NOESY in CD<sub>3</sub>OD for compound **1**.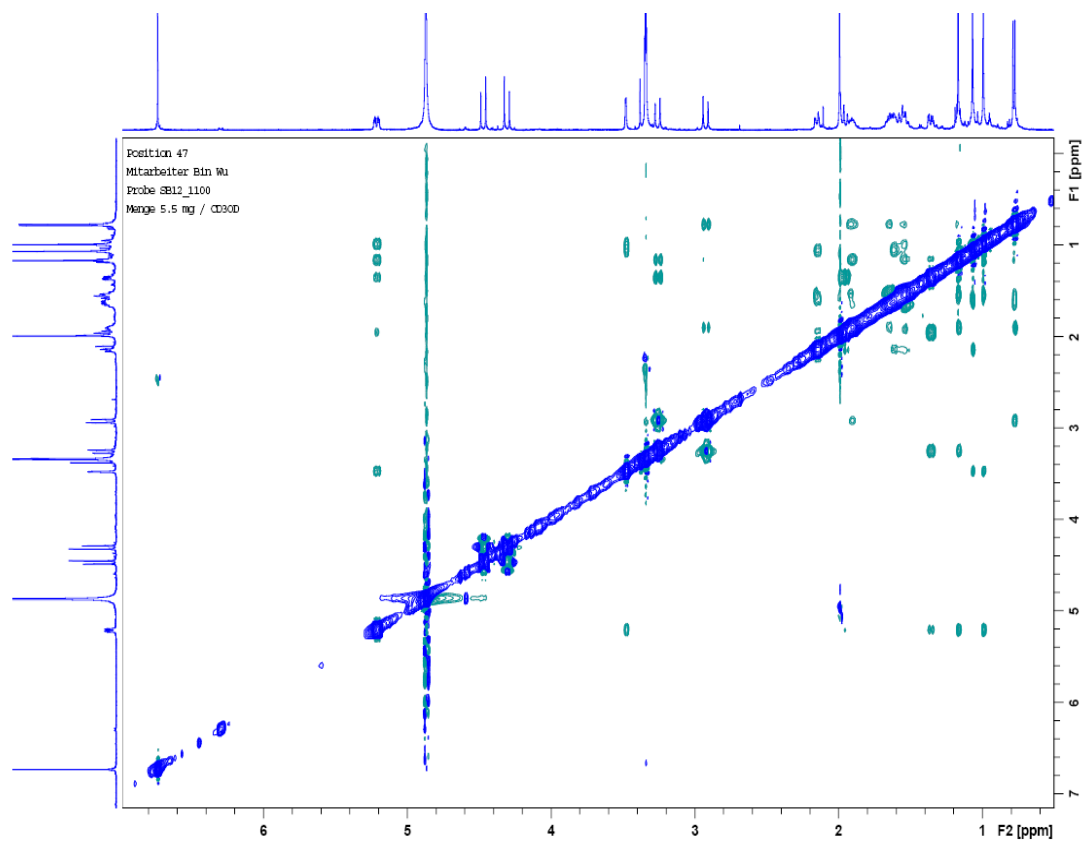

**Figure S10.**  $^1\text{H}$  NMR in  $\text{CD}_3\text{OD}$  for compound **2**.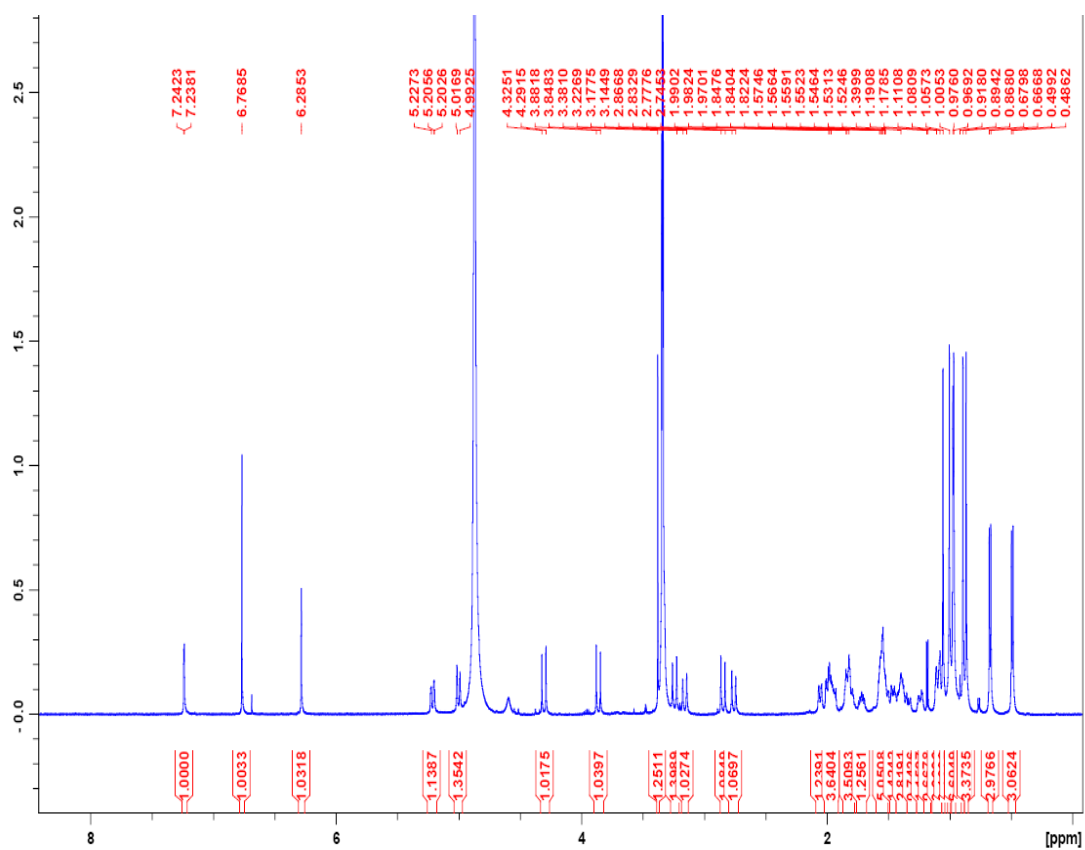**Figure S11.**  $^1\text{H}$  NMR-2 in  $\text{CD}_3\text{OD}$  for compound **2**.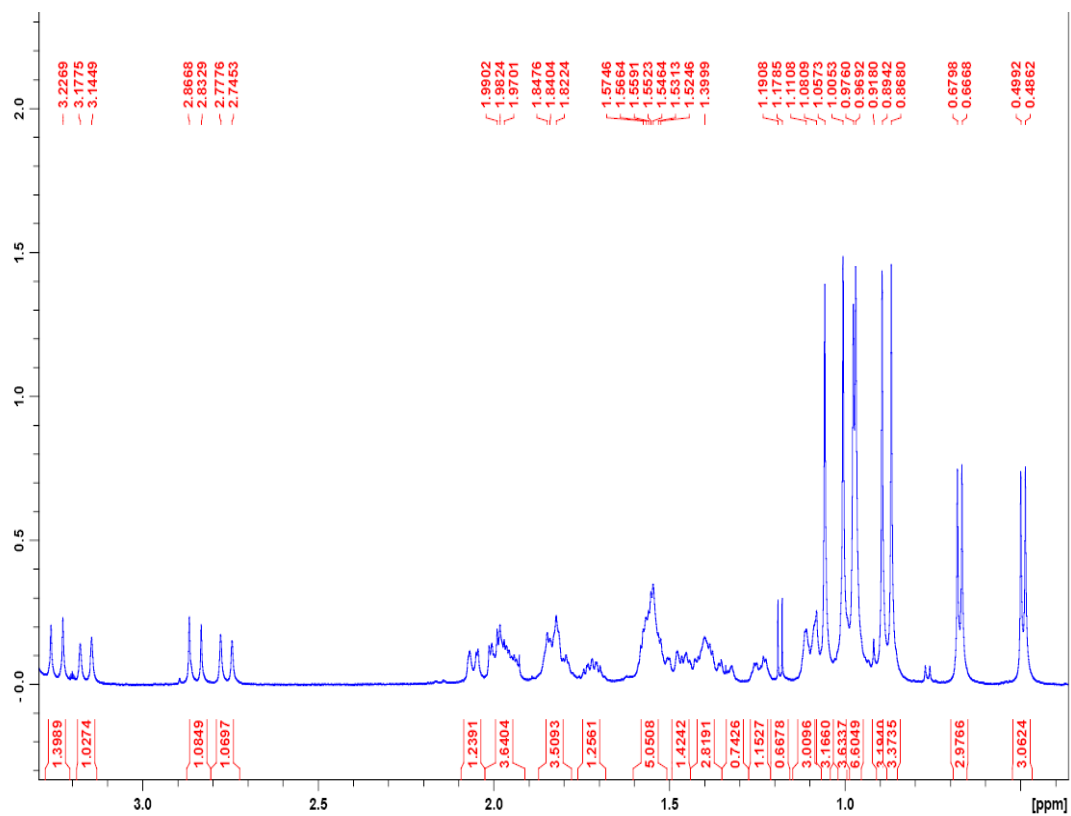

**Figure S12.**  $^{13}\text{C}$  NMR in  $\text{CD}_3\text{OD}$  for compound 2.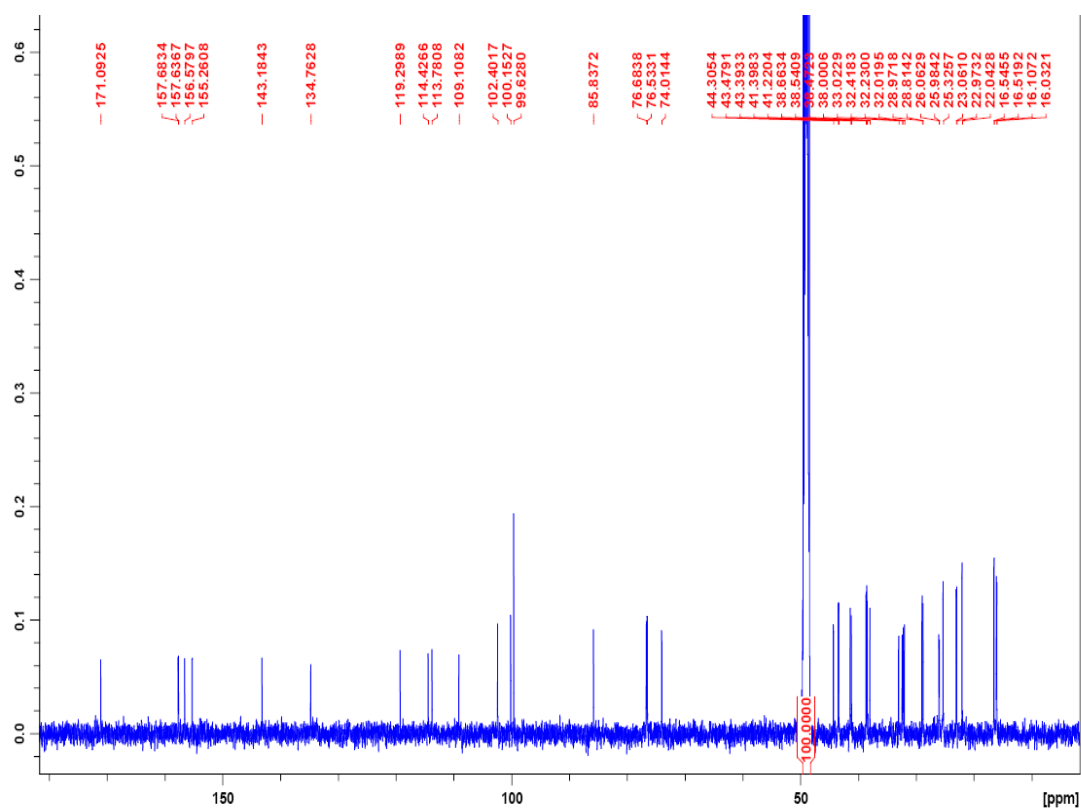**Figure S13.** COSY in  $\text{CD}_3\text{OD}$  for compound 2.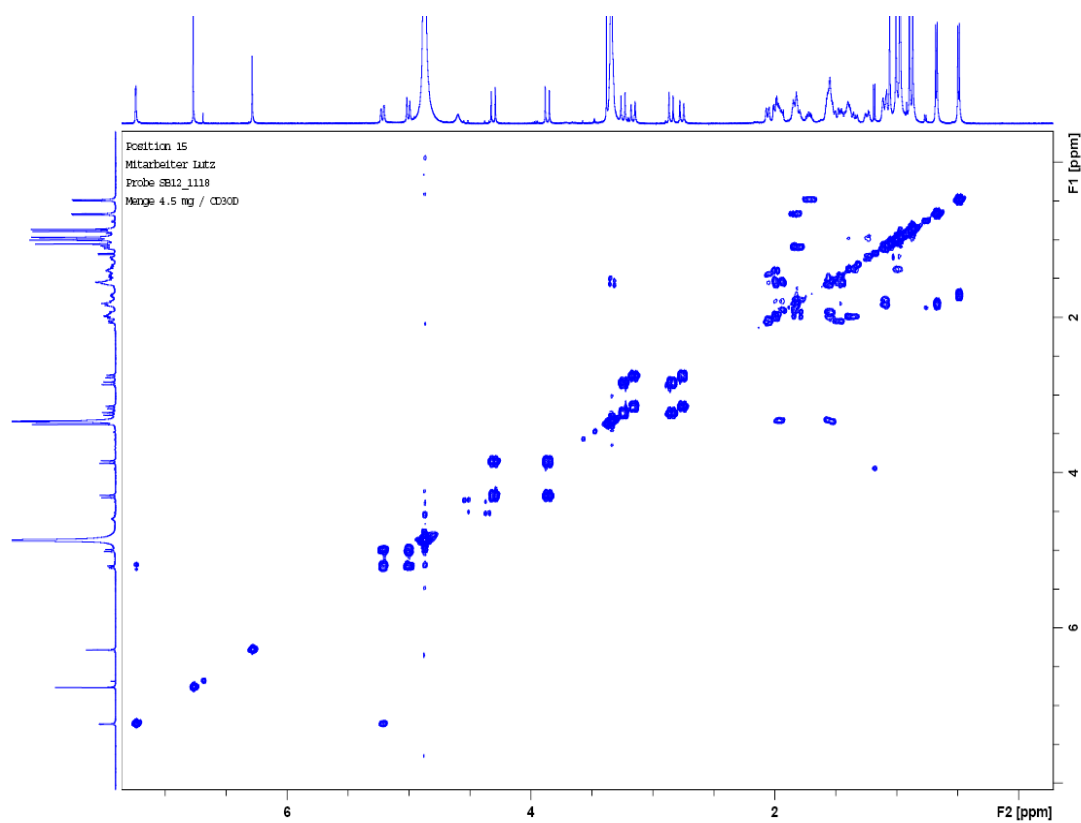

**Figure S14.** COSY-2 in CD<sub>3</sub>OD for compound 2.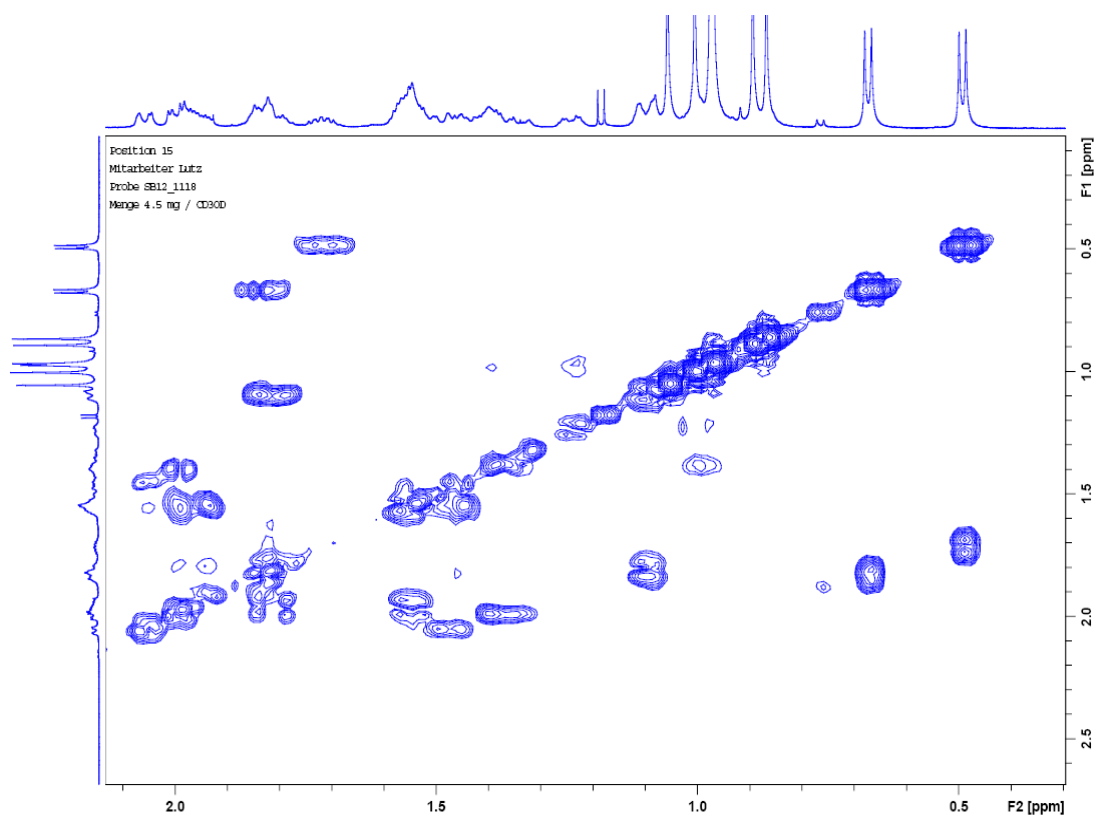**Figure S15.** HSQC in CD<sub>3</sub>OD for compound 2.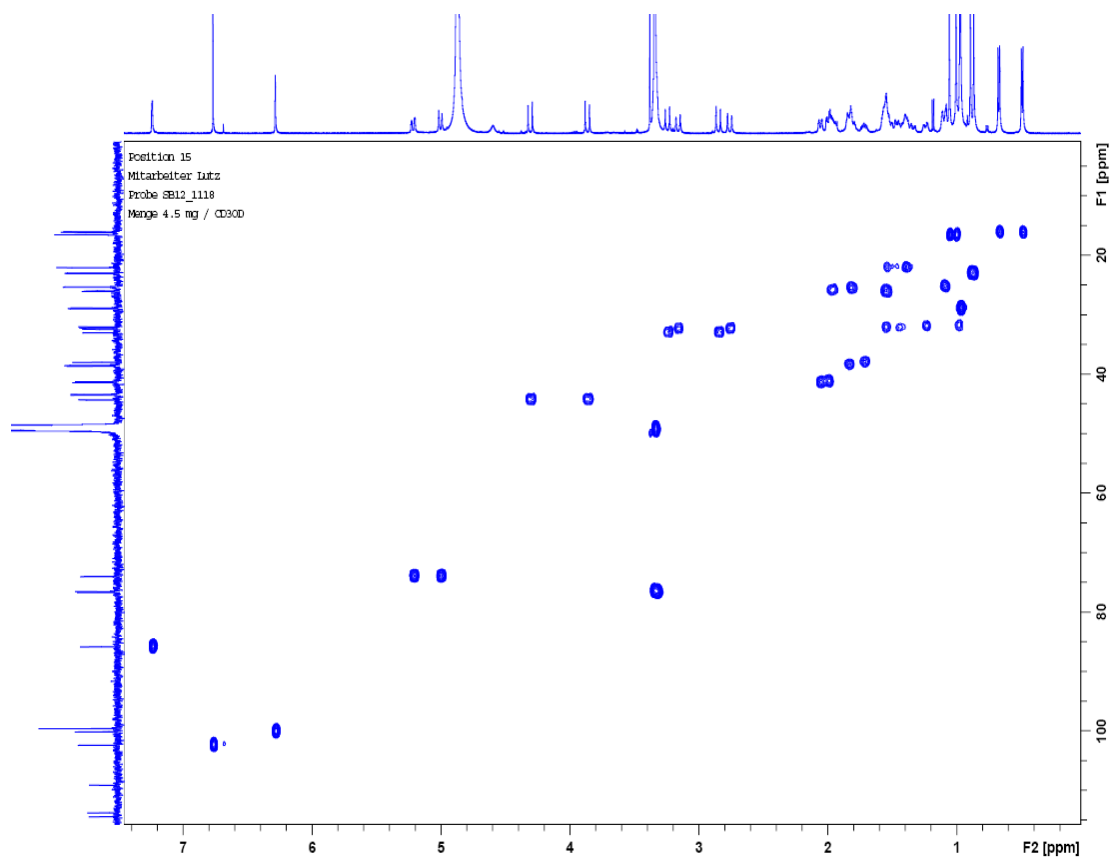

**Figure S16.** HMBC in CD<sub>3</sub>OD for compound 2.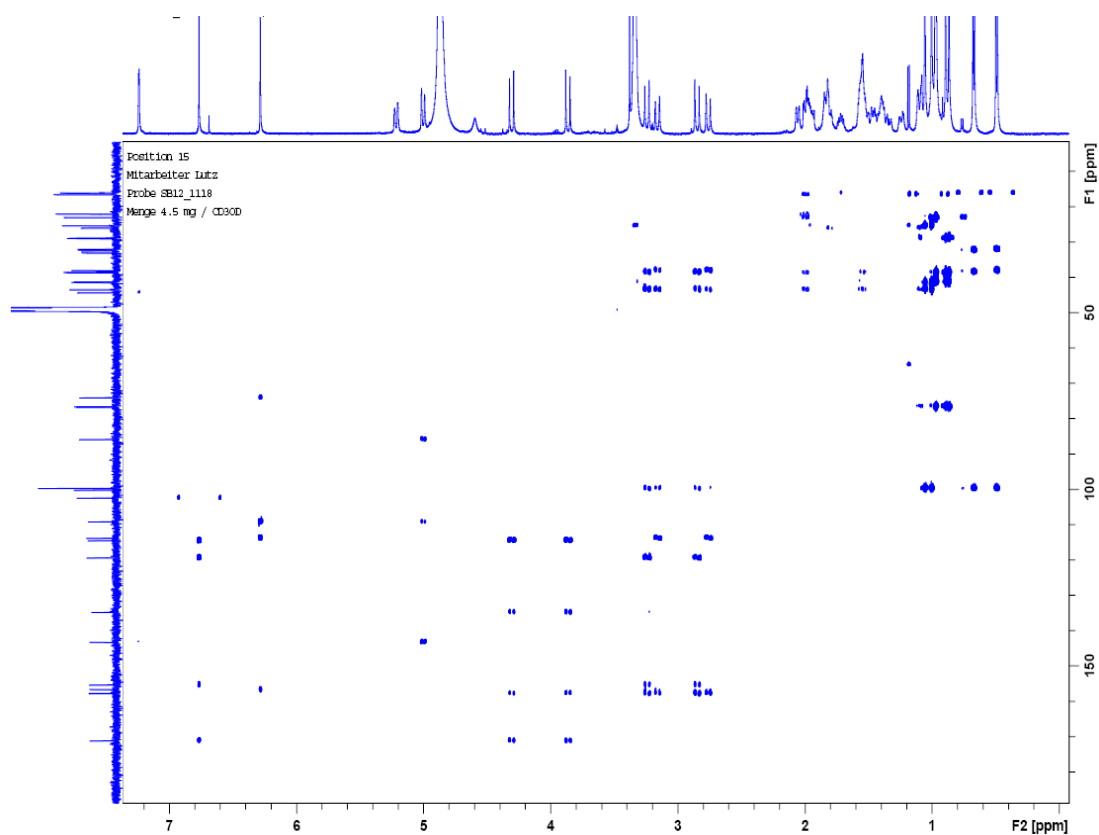**Figure S17.** HMBC-2 in CD<sub>3</sub>OD for compound 2.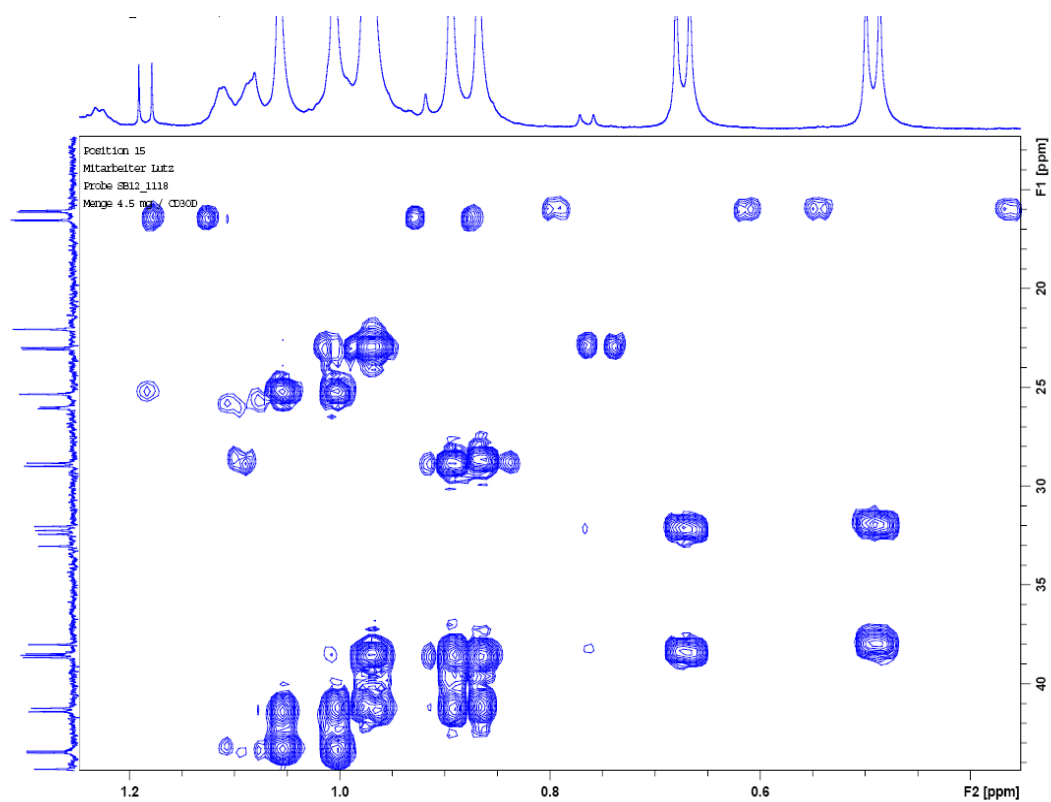

**Figure S18.** NOESY in CD<sub>3</sub>OD for compound 2.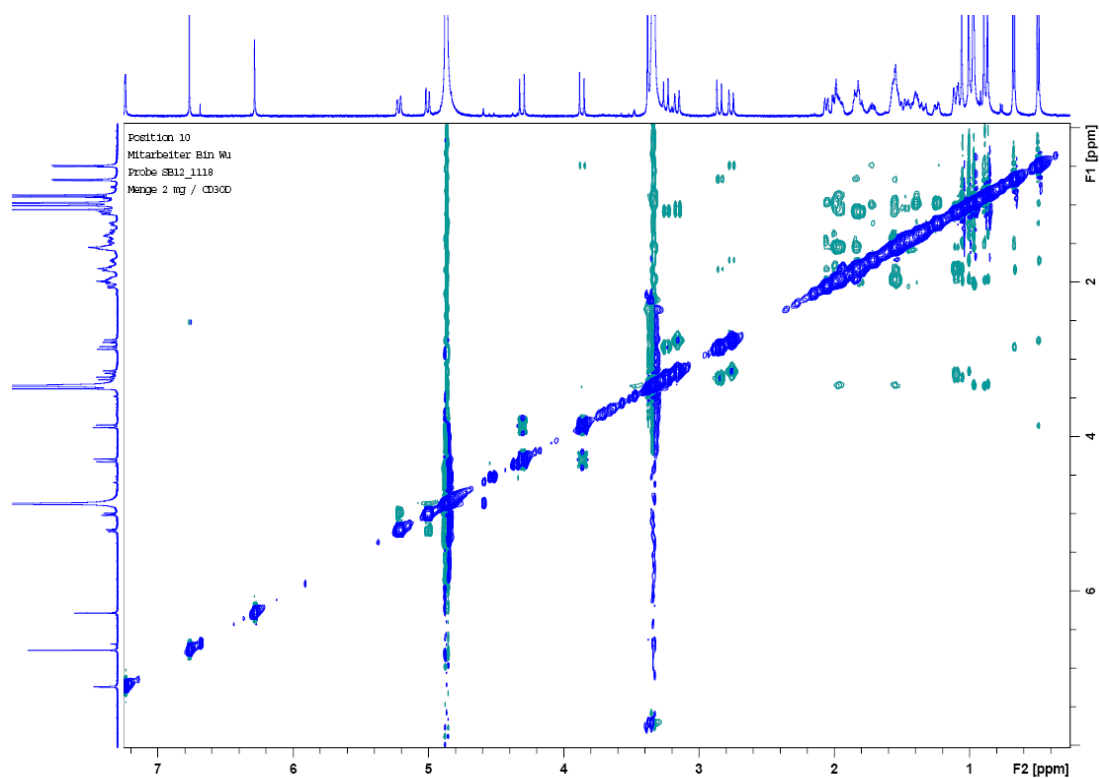**Figure S19.** <sup>1</sup>H NMR in CD<sub>3</sub>OD for compound 3.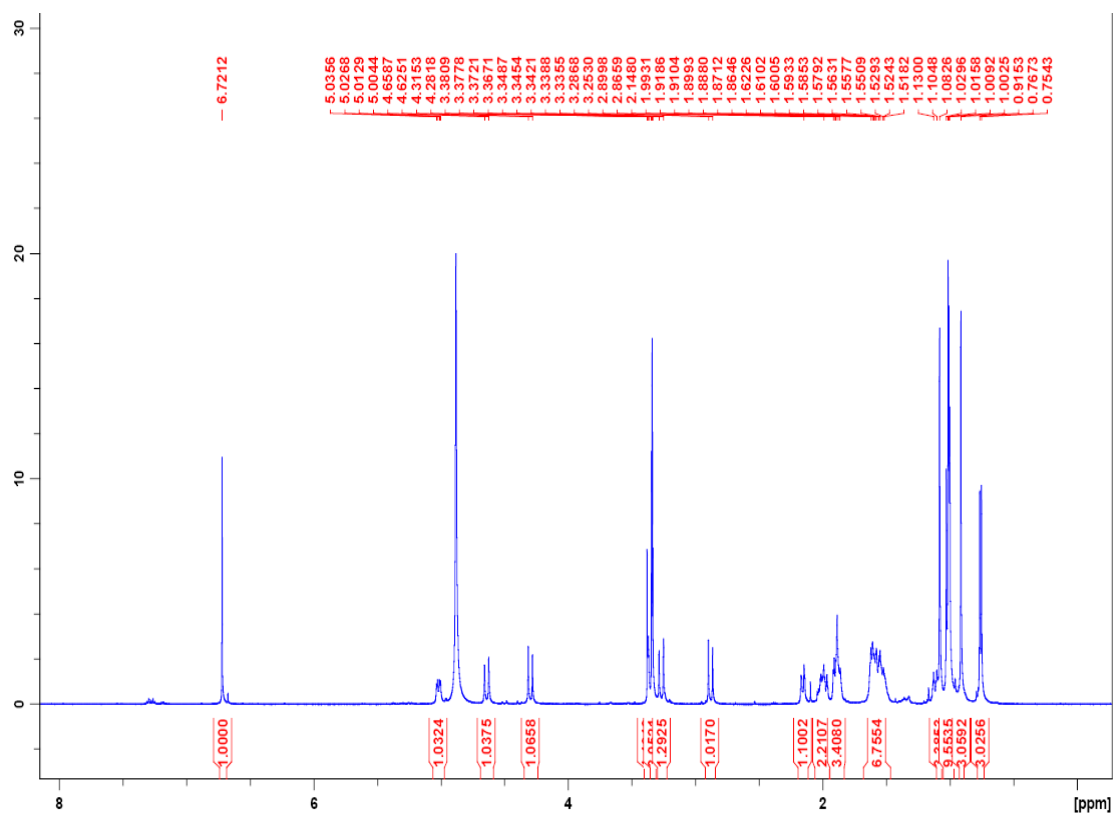

**Figure S20.**  $^{13}\text{C}$  NMR in  $\text{CD}_3\text{OD}$  for compound 3.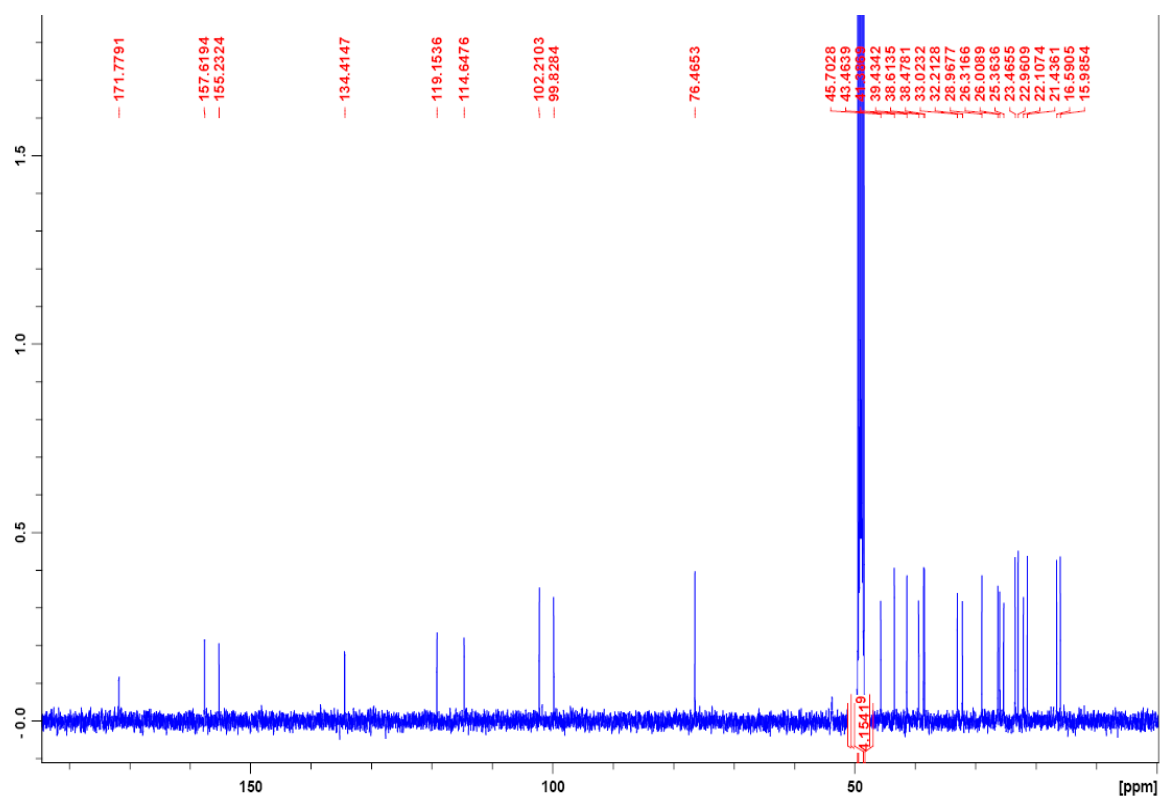**Figure S21.** COSY in  $\text{CD}_3\text{OD}$  for compound 3.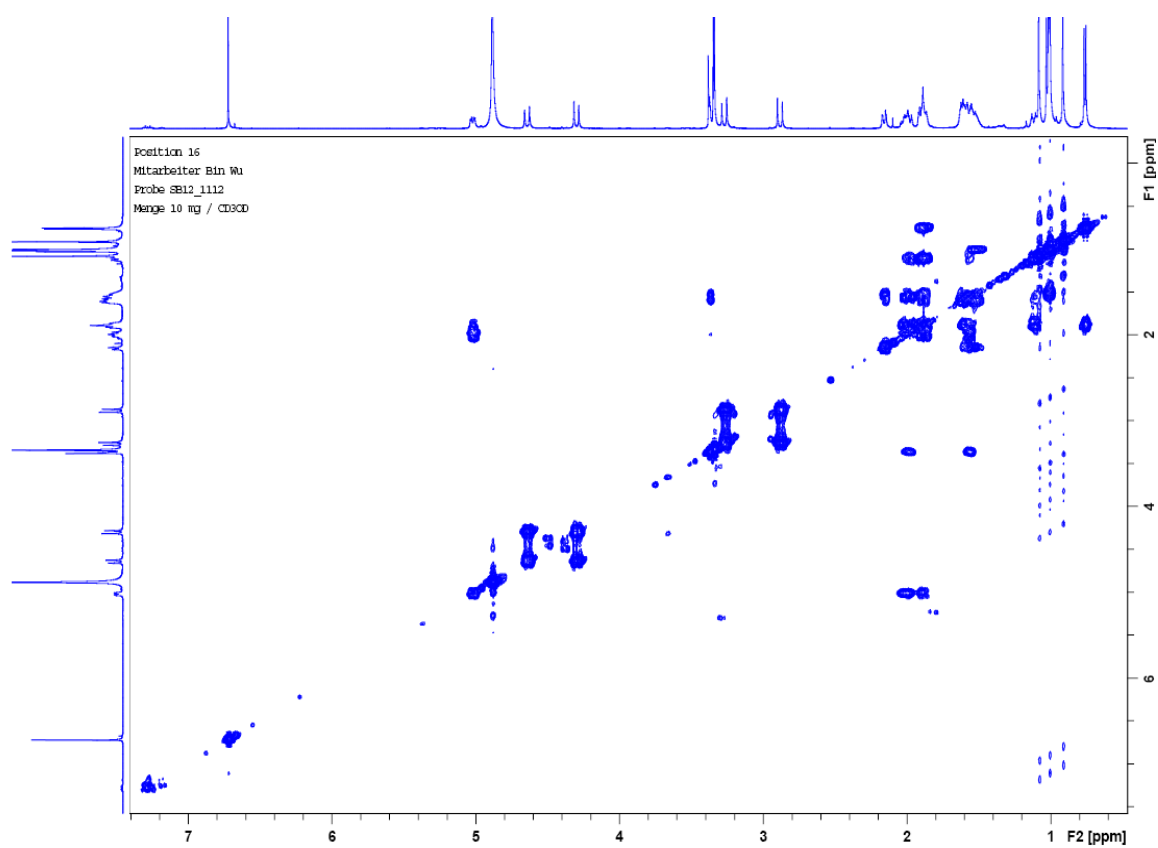

**Figure S22.** COSY-2 in CD<sub>3</sub>OD for compound **3**.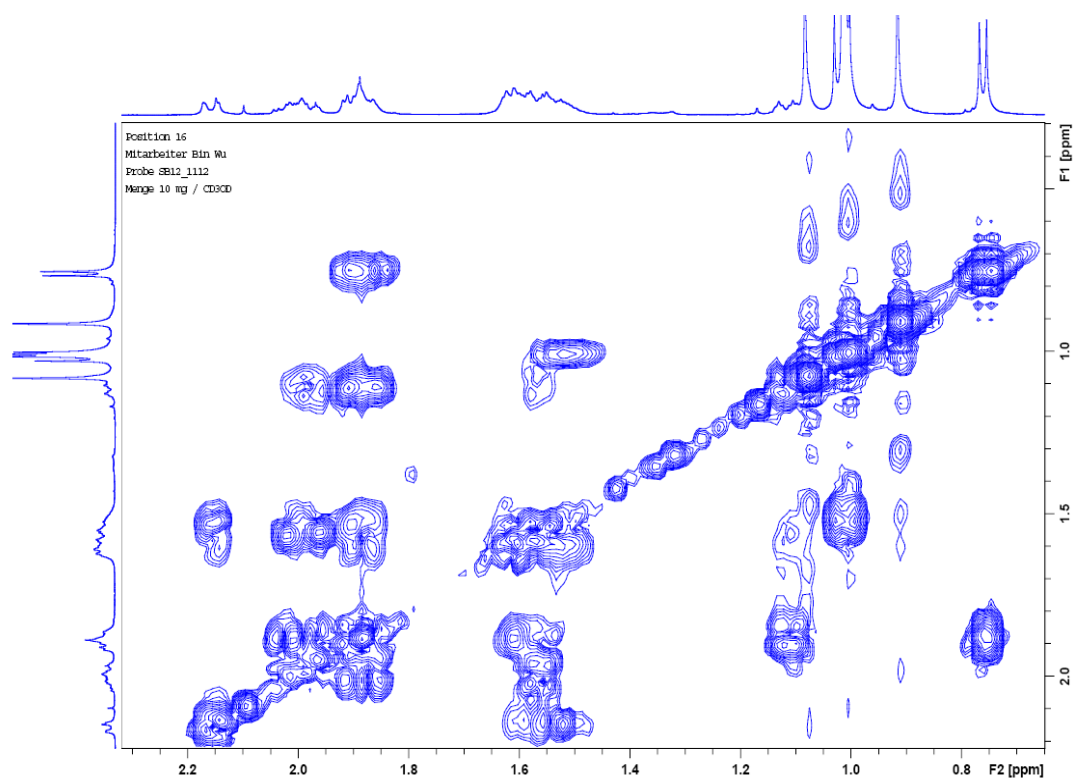**Figure S24.** HSQC in CD<sub>3</sub>OD for compound **3**.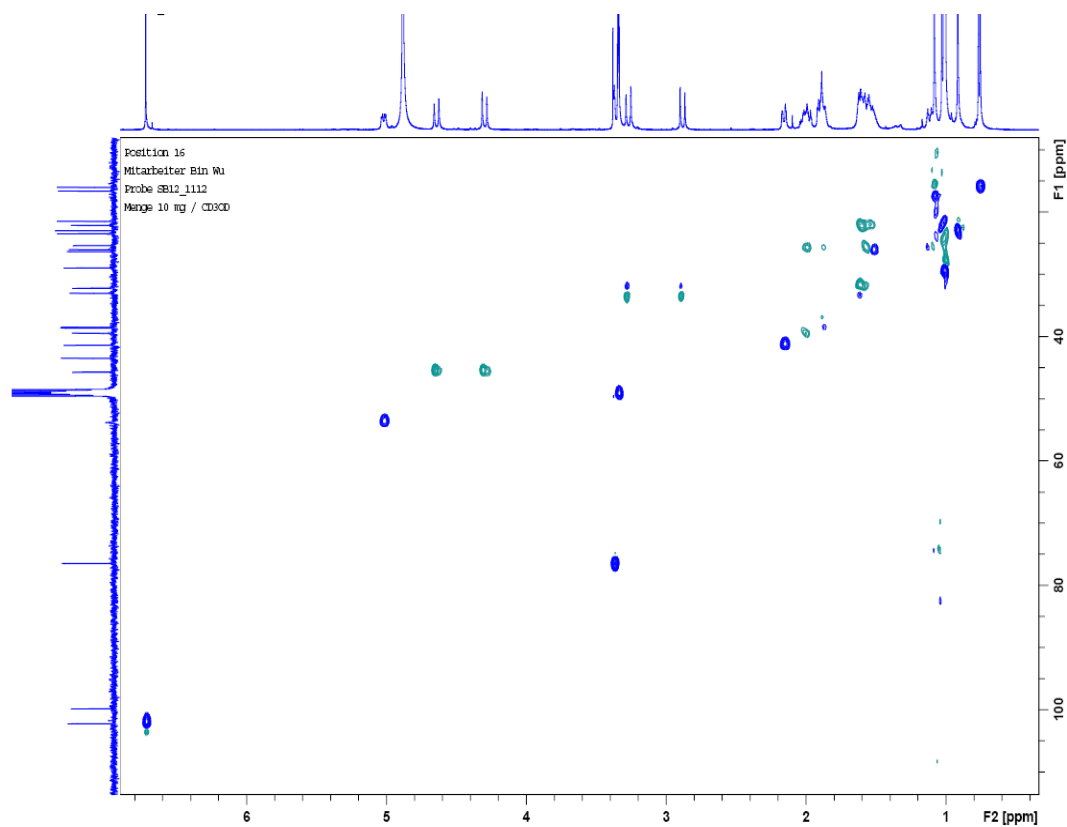

**Figure S25.** HMBC in CD<sub>3</sub>OD for compound 3.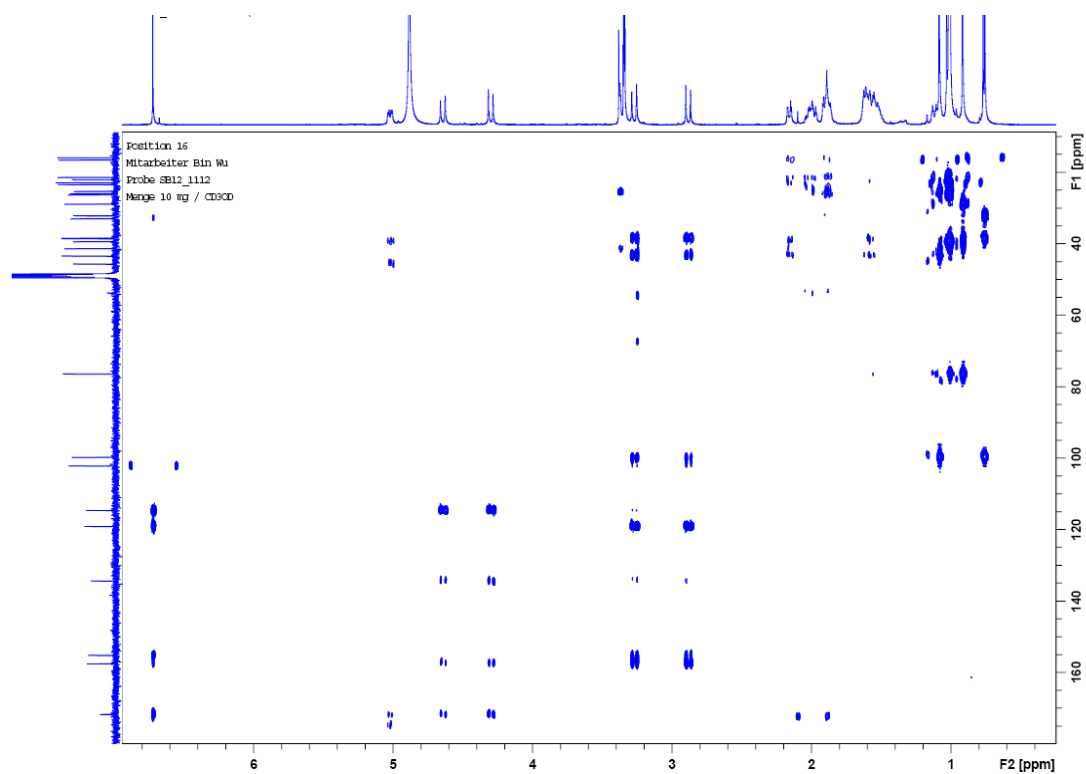**Figure S26.** HMBC-2 in CD<sub>3</sub>OD for compound 3.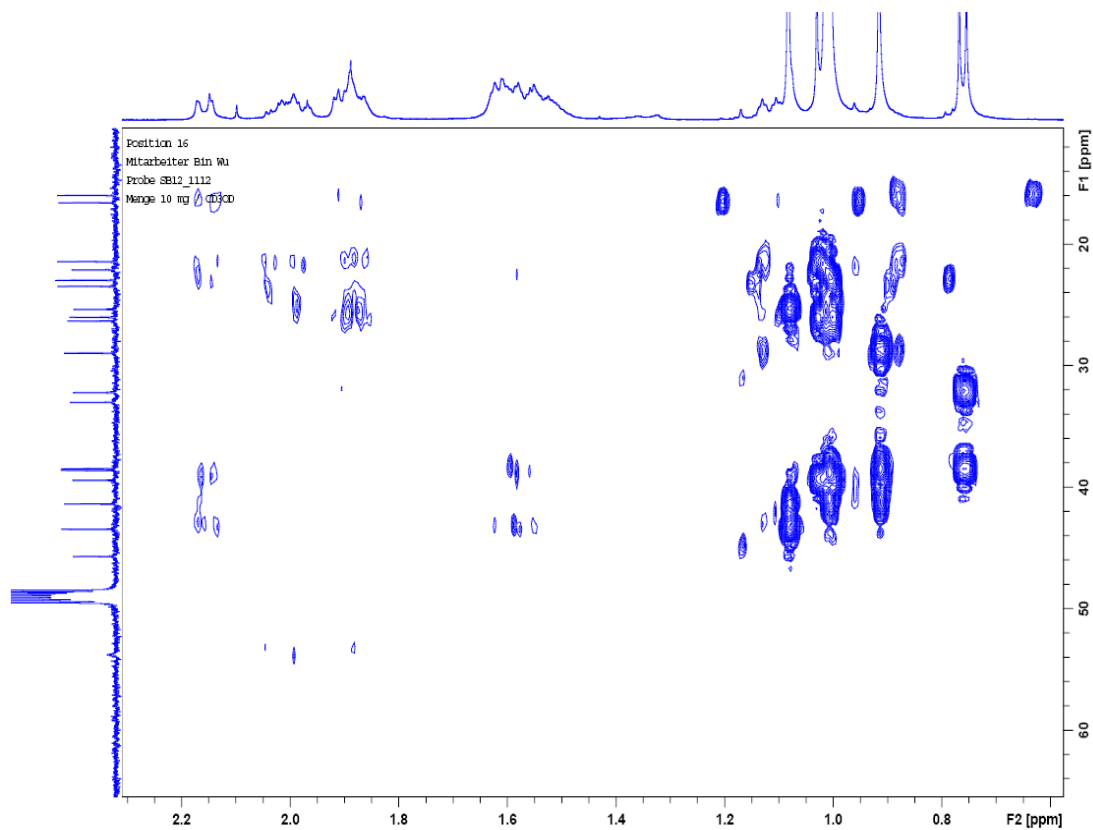

Figure S27. NOESY in CD<sub>3</sub>OD for compound 3.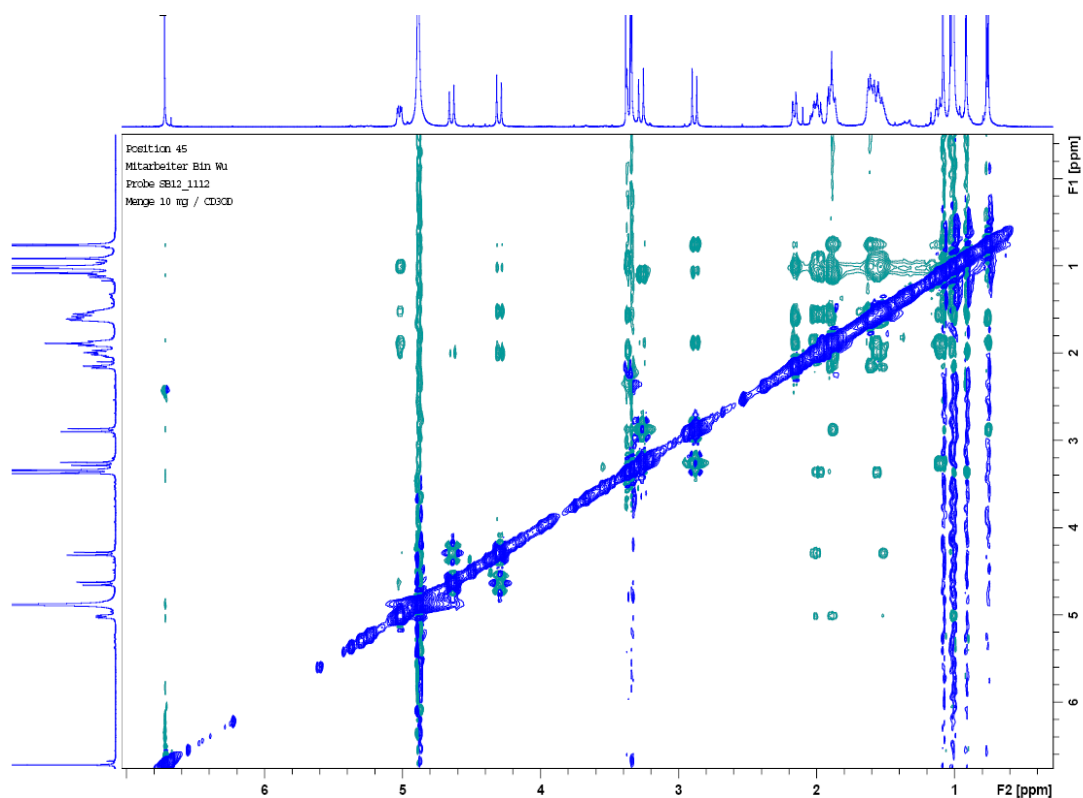Figure S28. <sup>1</sup>H NMR in CD<sub>3</sub>OD for compound 4.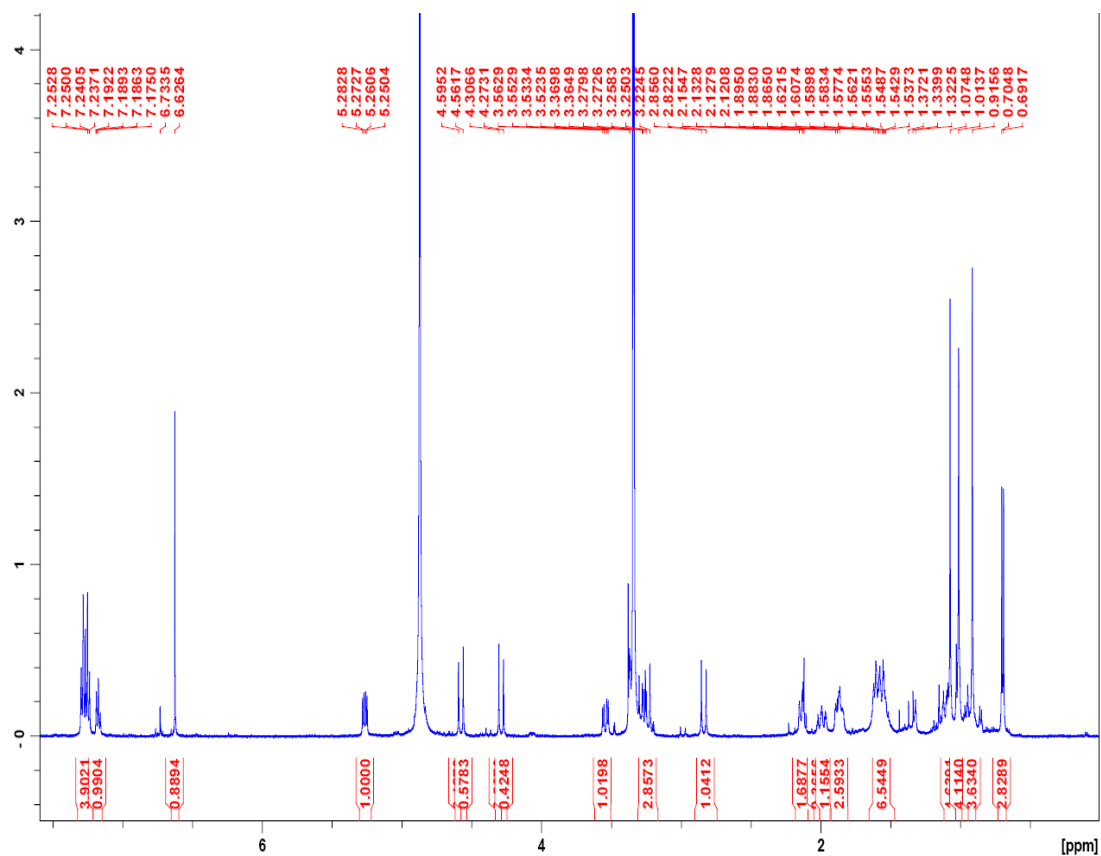

**Figure S29.**  $^{13}\text{C}$  NMR in  $\text{CD}_3\text{OD}$  for compound 4.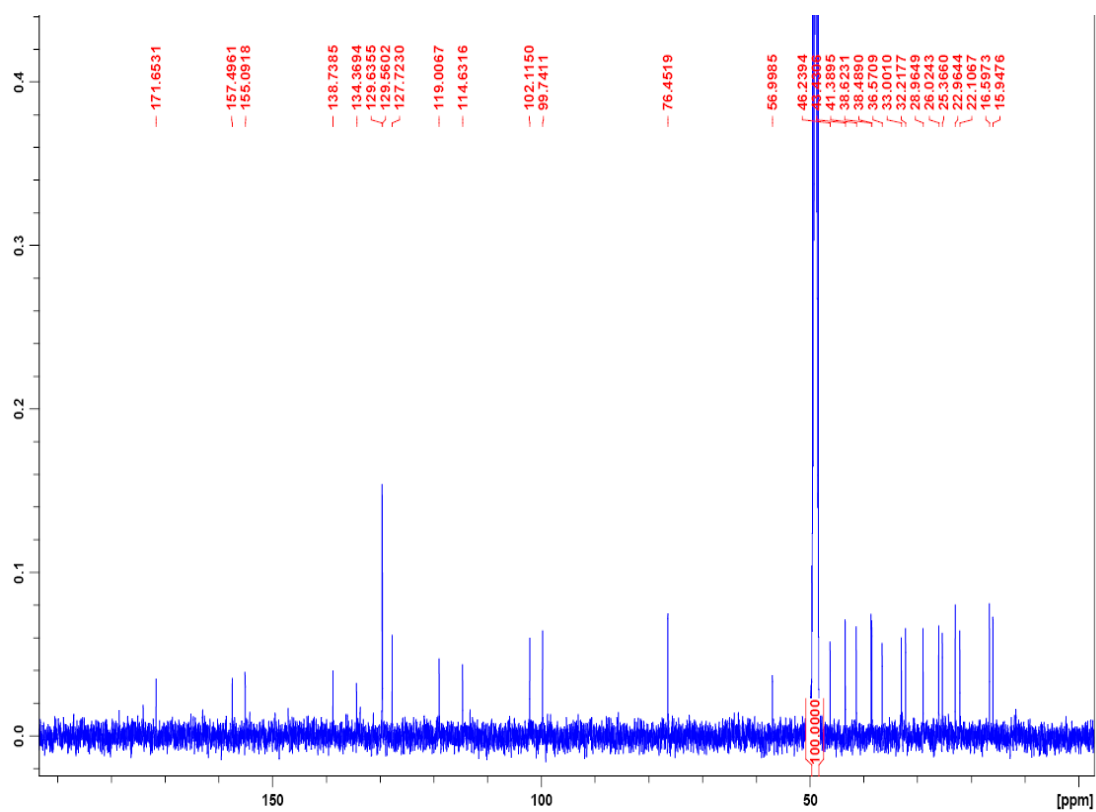**Figure S30.** COSY in  $\text{CD}_3\text{OD}$  for compound 4.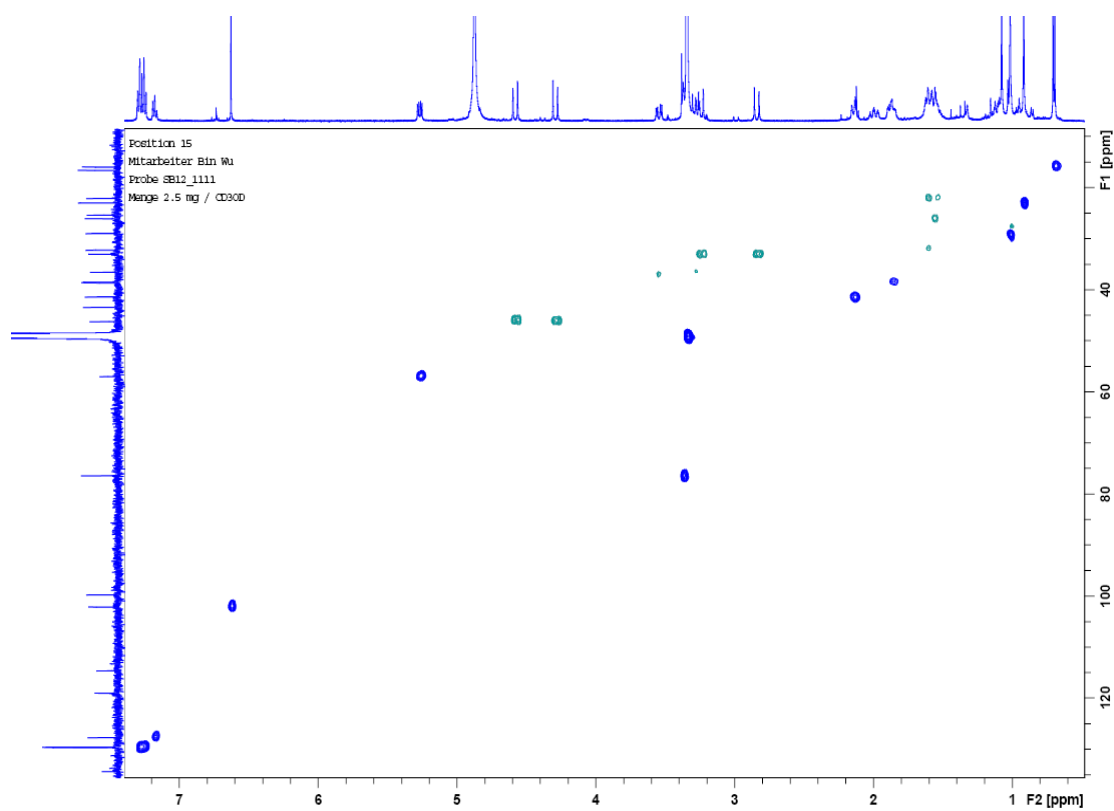

**Figure S31.** HSQC in CD<sub>3</sub>OD for compound **4**.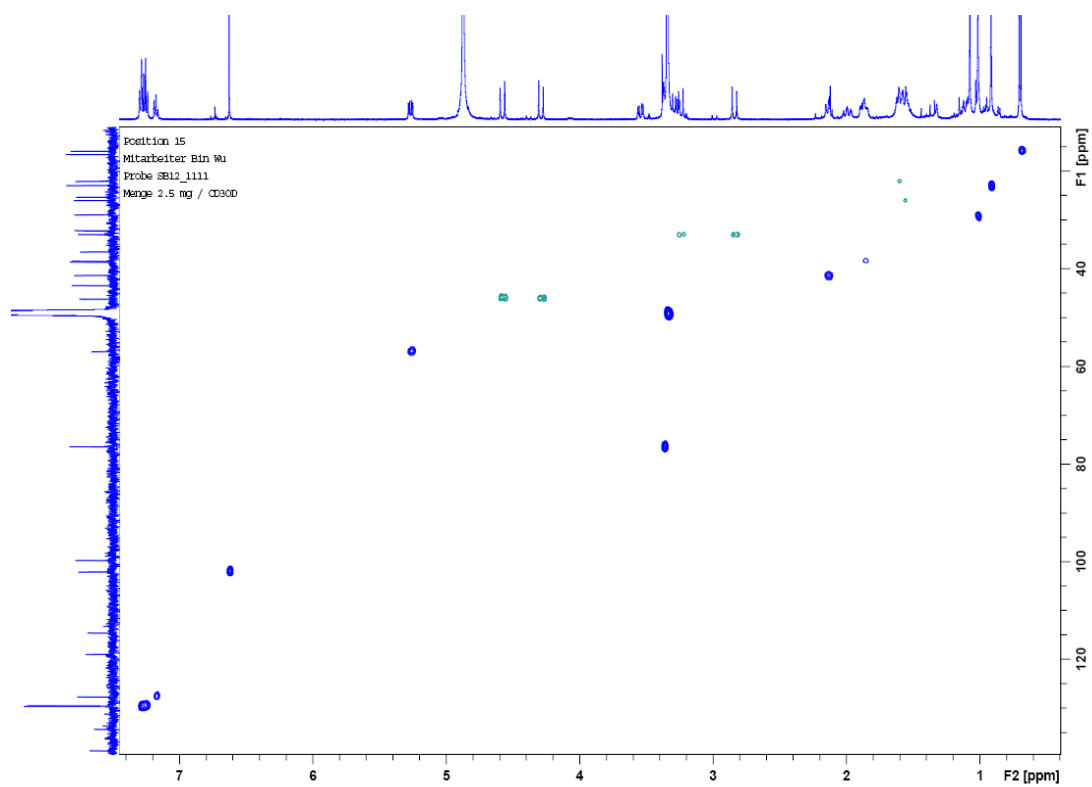**Figure S32.** HMBC in CD<sub>3</sub>OD for compound **4**.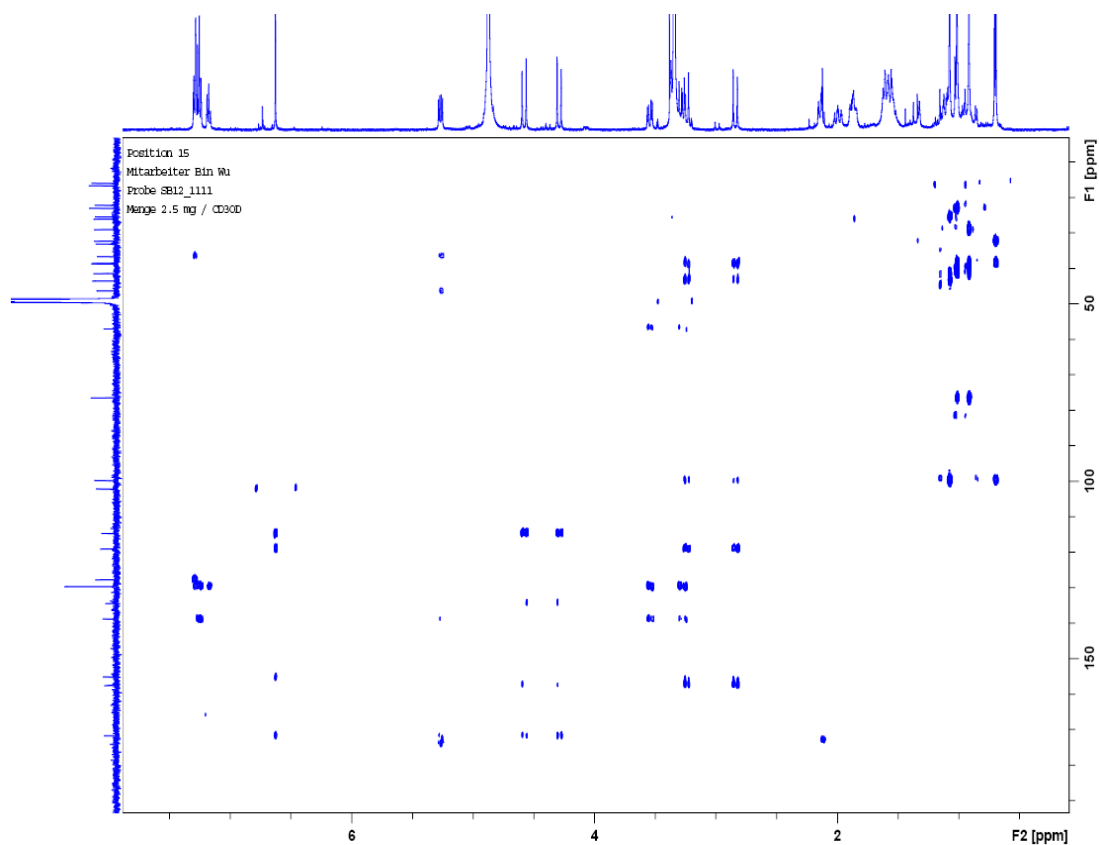

**Figure S33.**  $^1\text{H}$  NMR in  $\text{CD}_3\text{OD}$  for compound 5.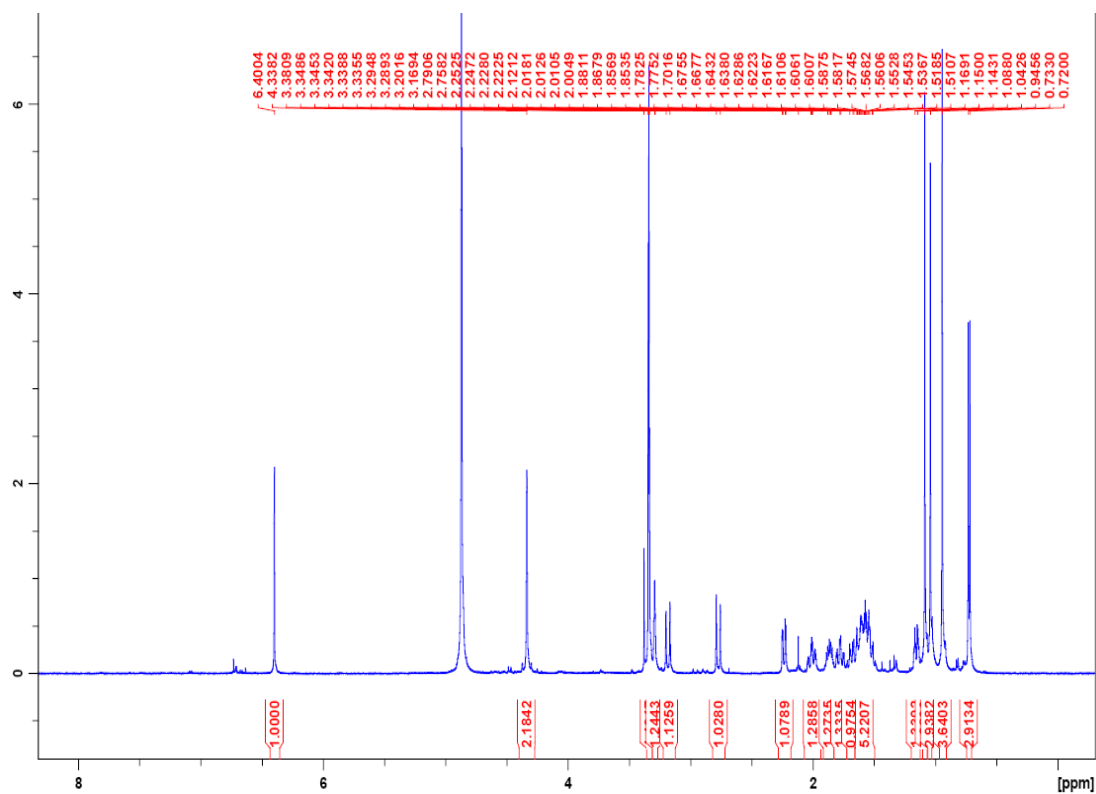**Figure S34.**  $^1\text{H}$  NMR-2 in  $\text{CD}_3\text{OD}$  for compound 5.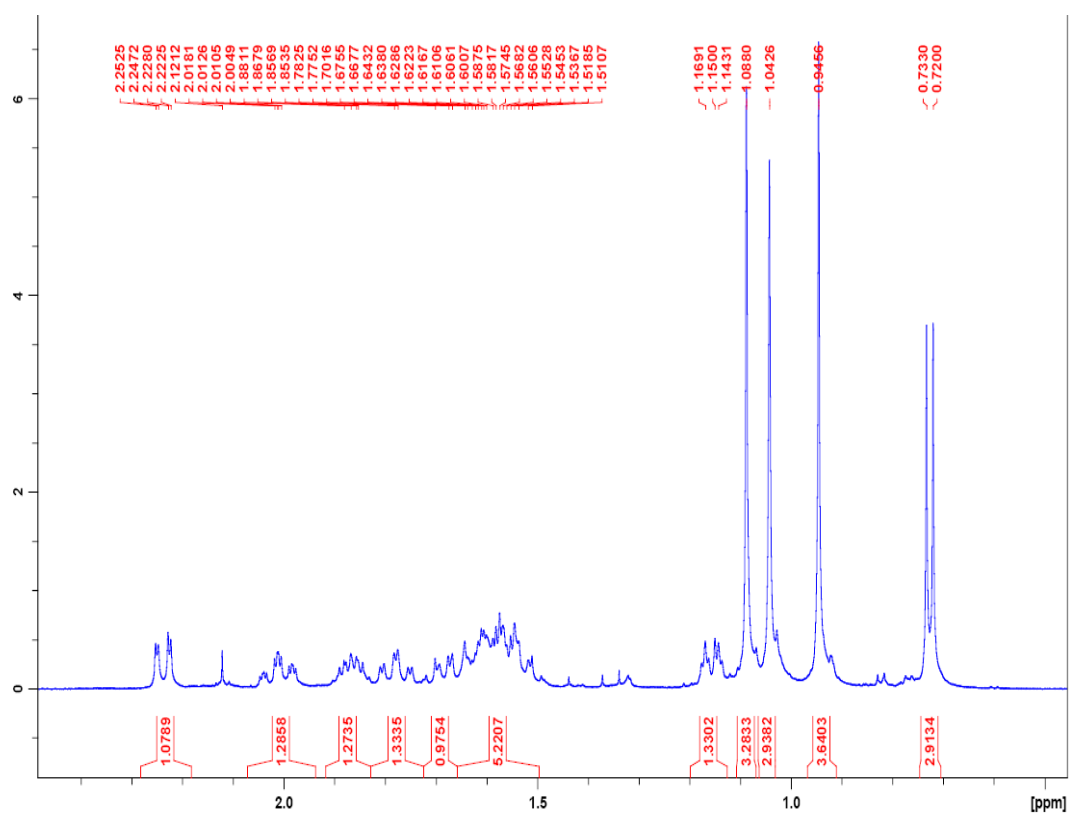

**Figure S35.**  $^{13}\text{C}$  NMR in  $\text{CD}_3\text{OD}$  for compound **5**.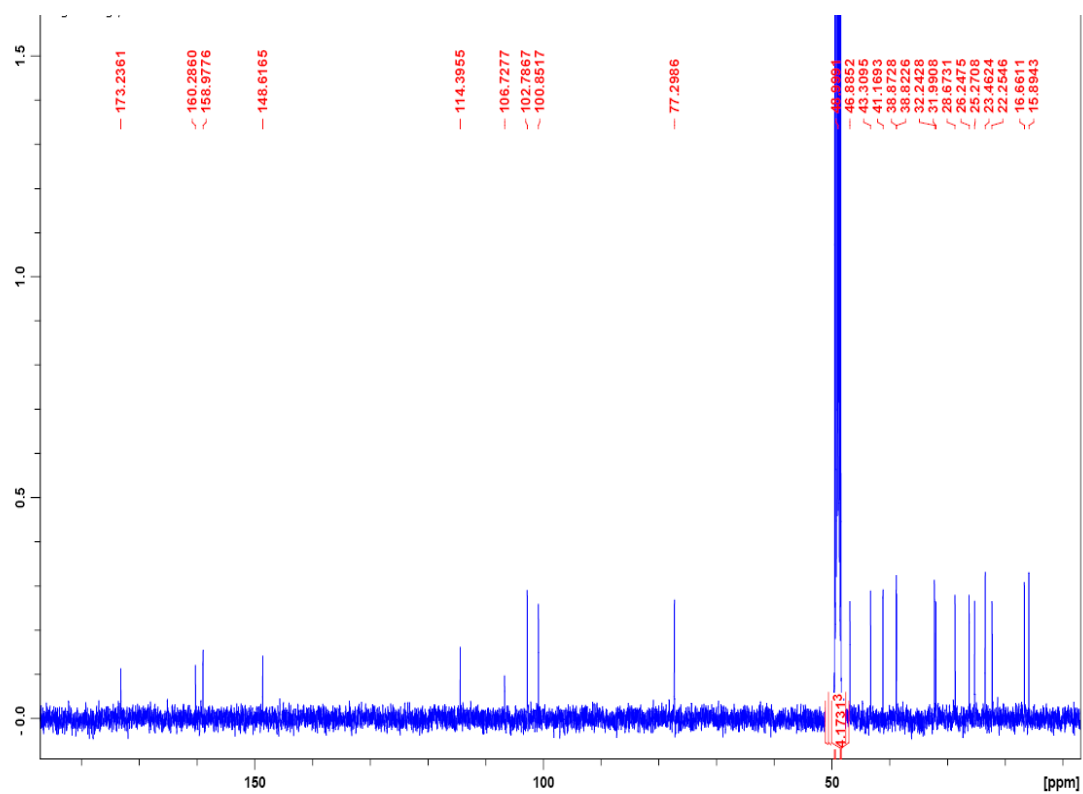**Figure S36.** COSY in  $\text{CD}_3\text{OD}$  for compound **5**.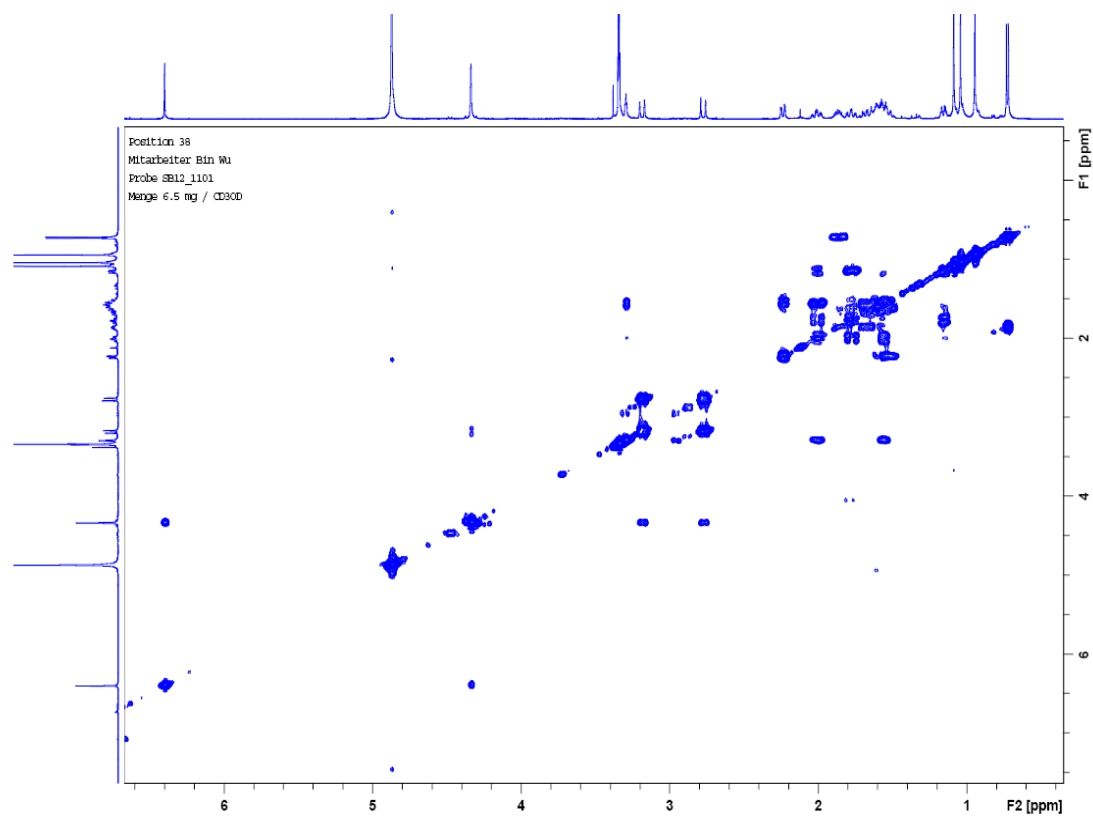

**Figure S37.** COSY-2 in CD<sub>3</sub>OD for compound **5**.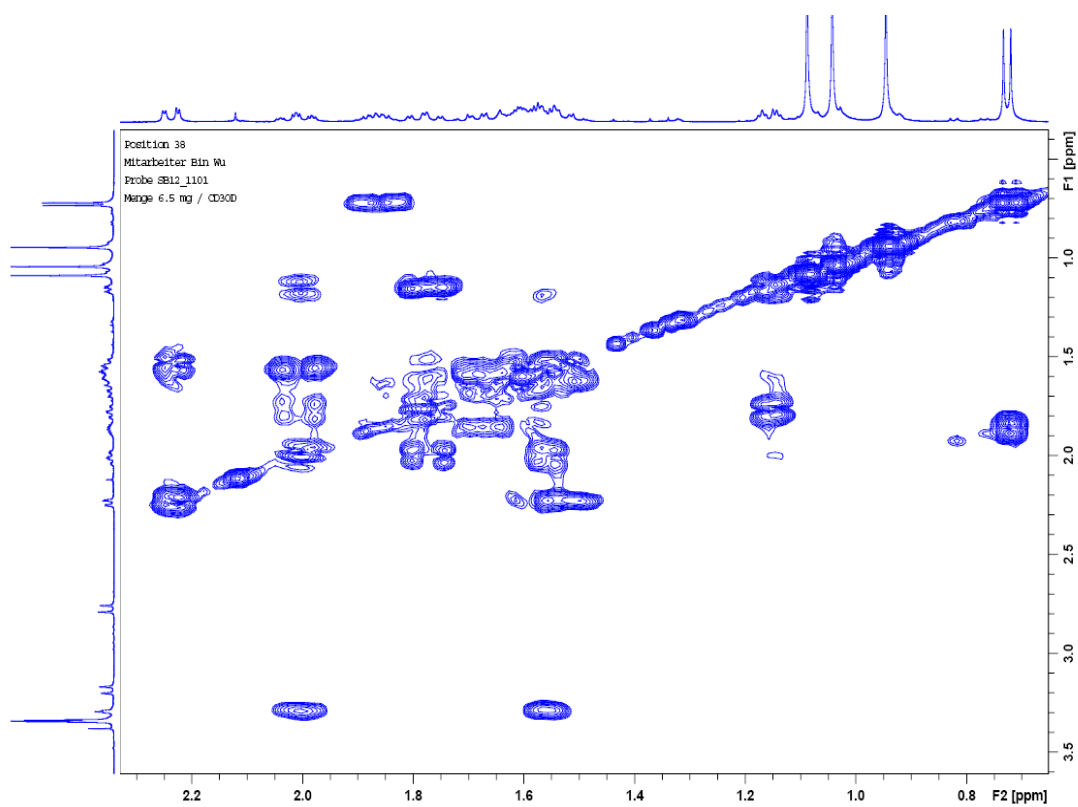**Figure S38.** HSQC in CD<sub>3</sub>OD for compound **5**.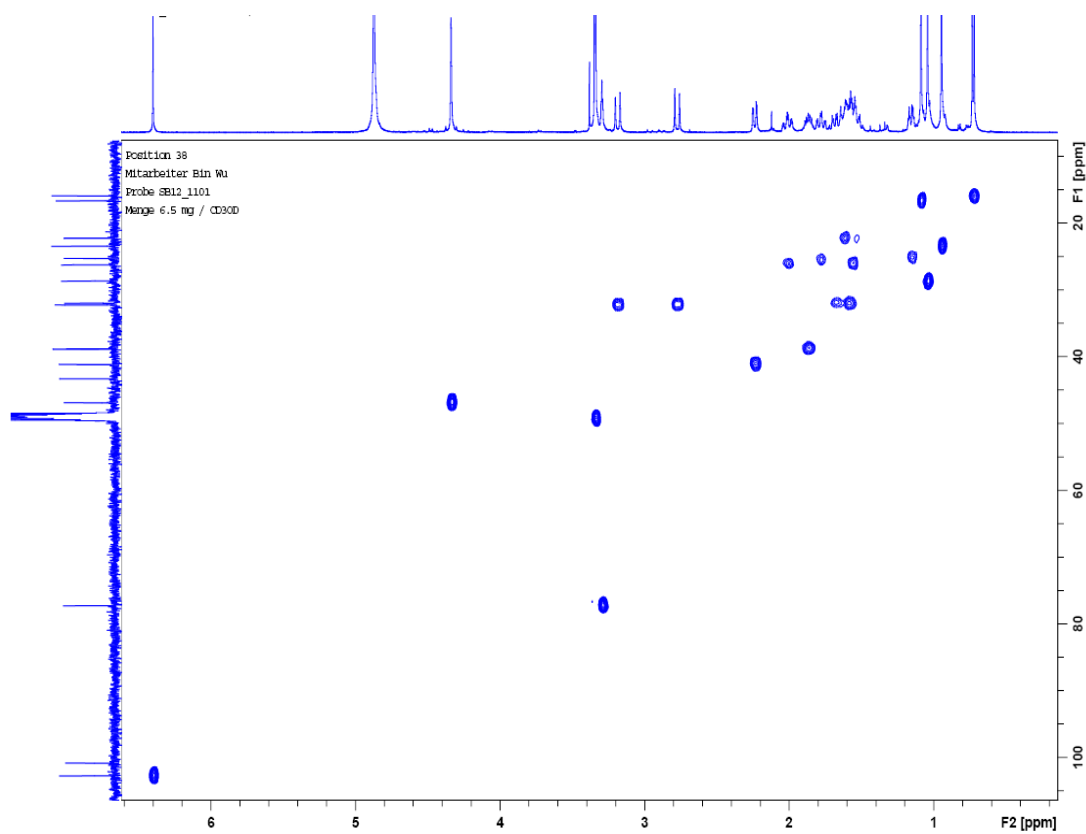

**Figure S39.** HMBC in CD<sub>3</sub>OD for compound **5**.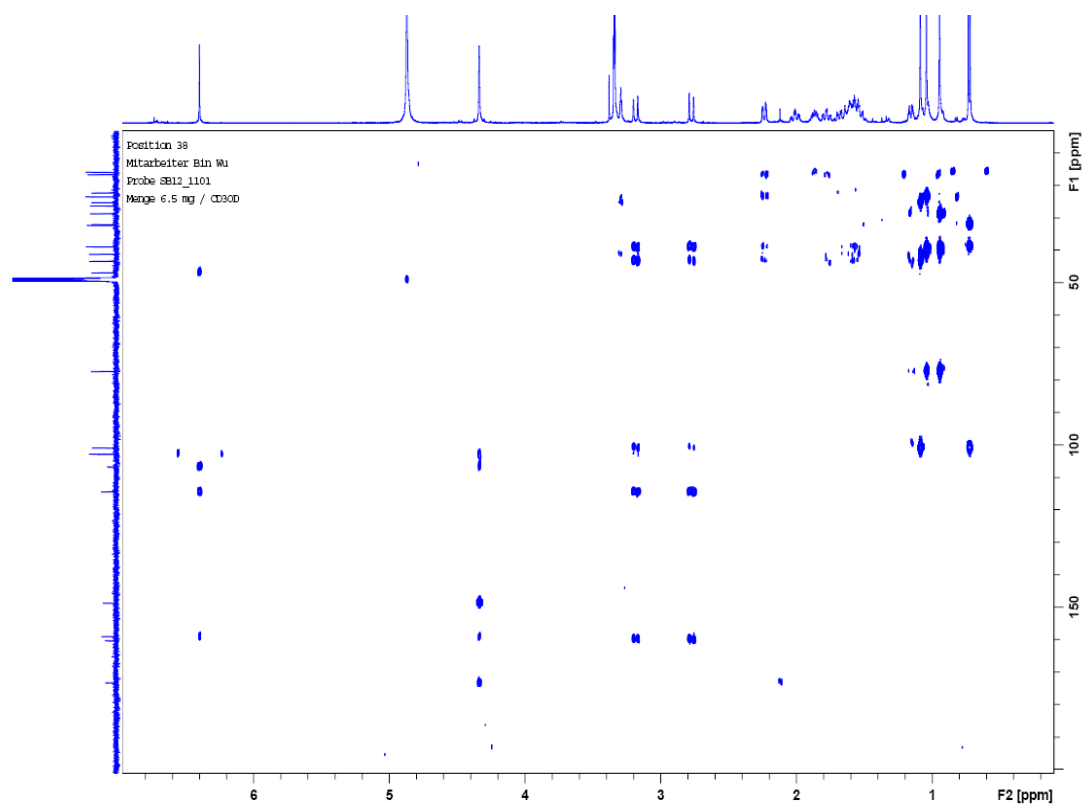**Figure S40.** HMBC-2 in CD<sub>3</sub>OD for compound **5**.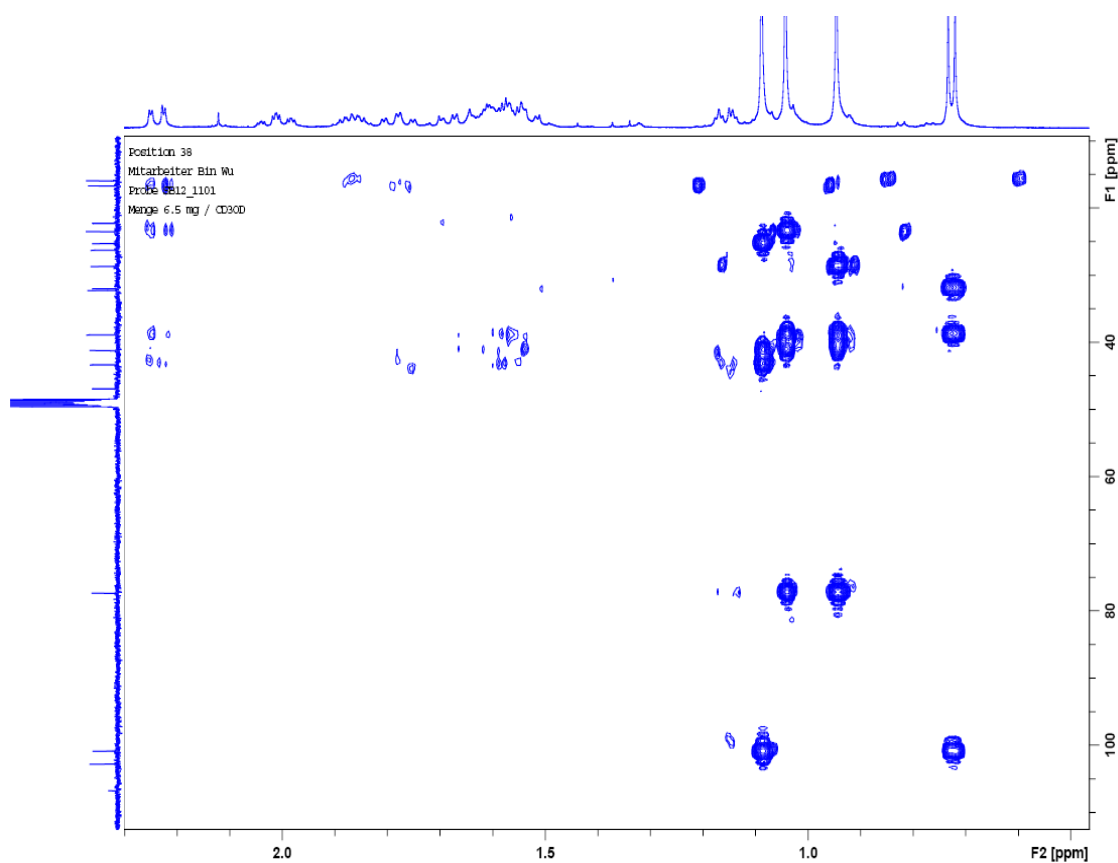

**Figure S41.** NOESY in CD<sub>3</sub>OD for compound **5**.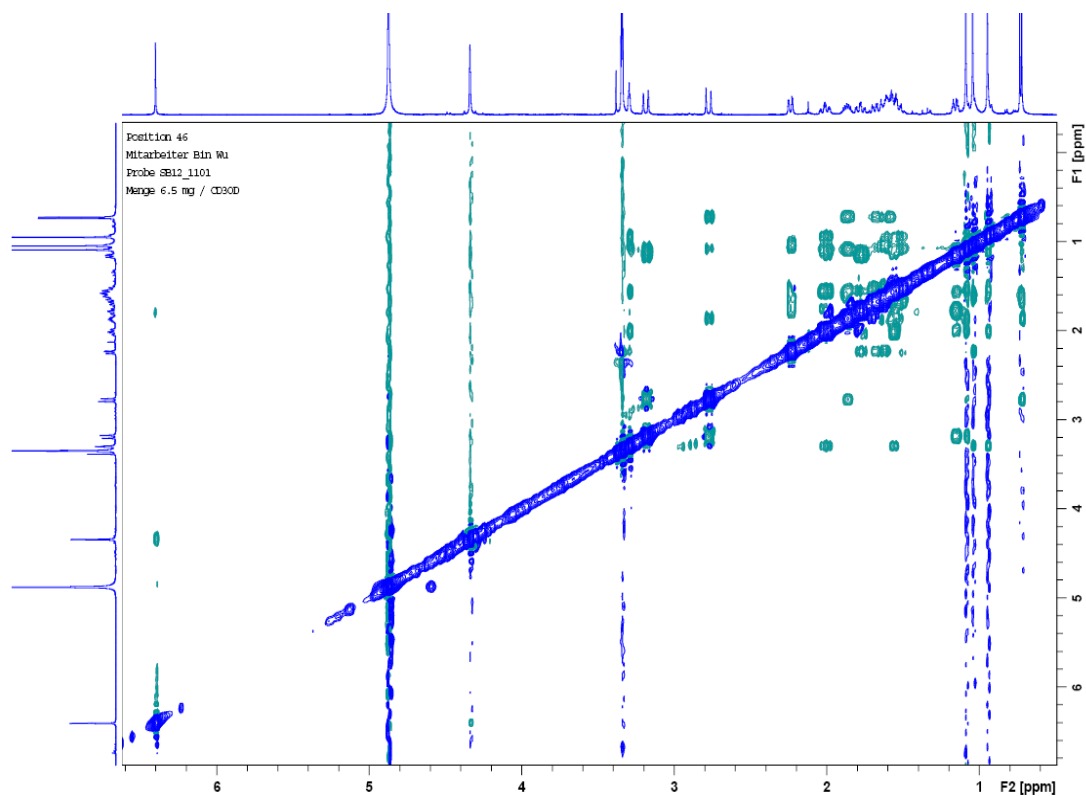**Figure S42.** <sup>1</sup>H NMR in CD<sub>3</sub>OD for compound **6**.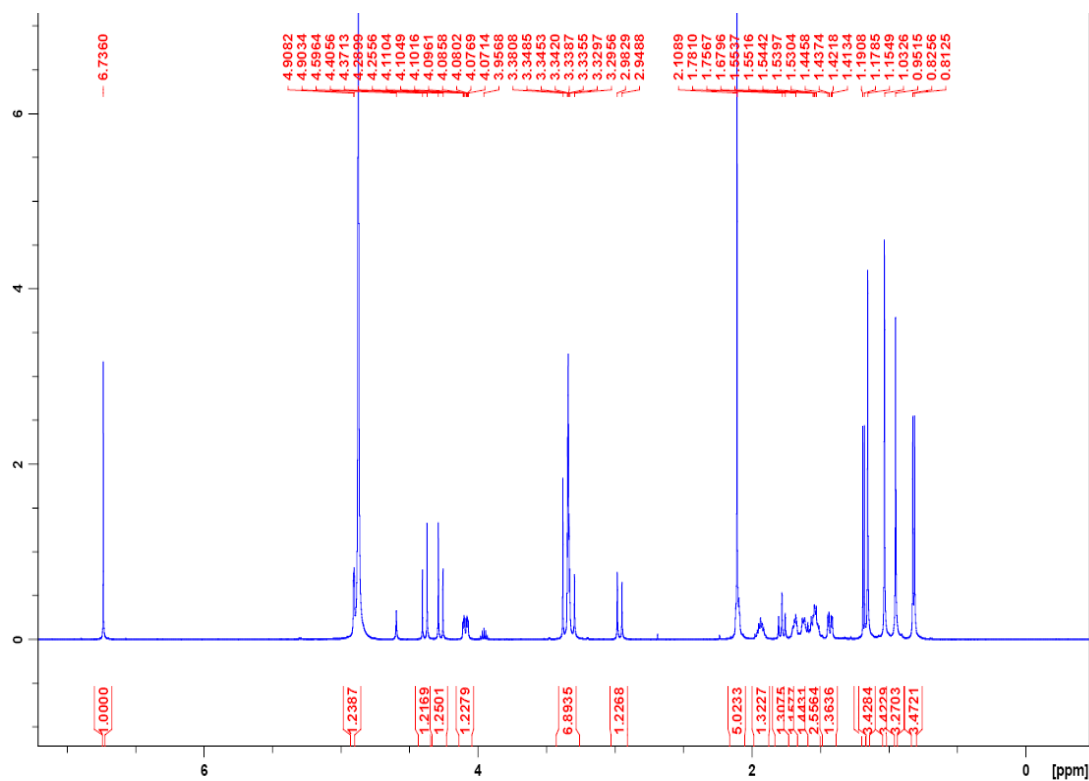

**Figure S43.**  $^1\text{H}$  NMR-2 in  $\text{CD}_3\text{OD}$  for compound **6**.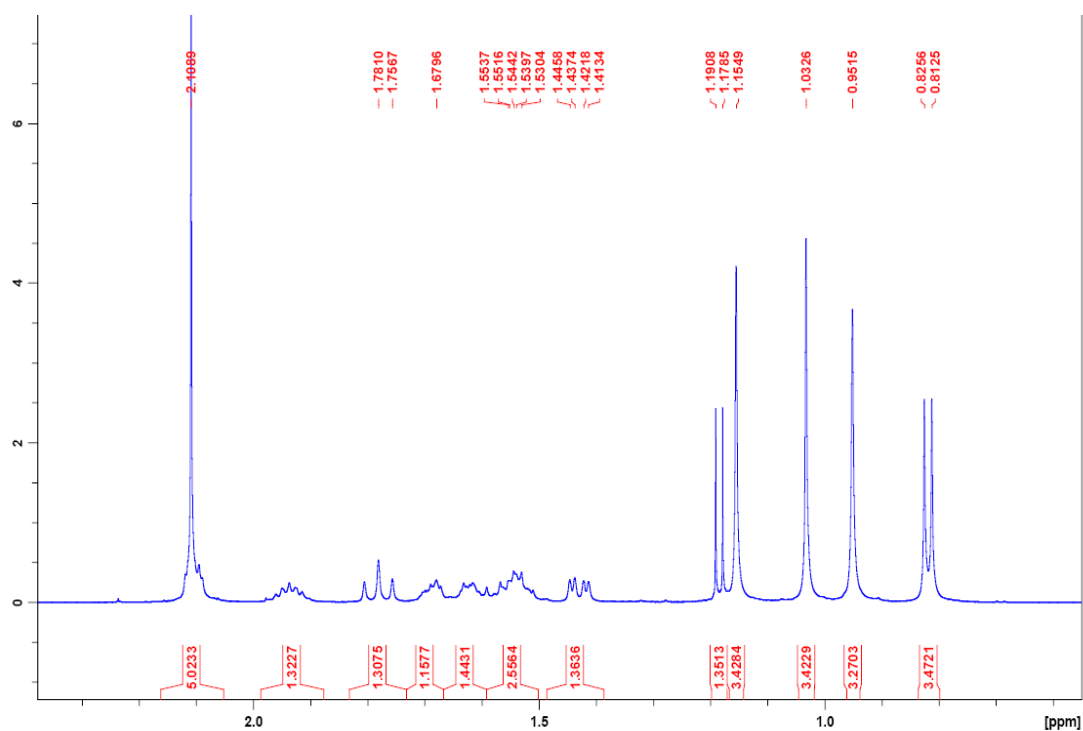**Figure S44.**  $^{13}\text{C}$  NMR in  $\text{CD}_3\text{OD}$  for compound **6**.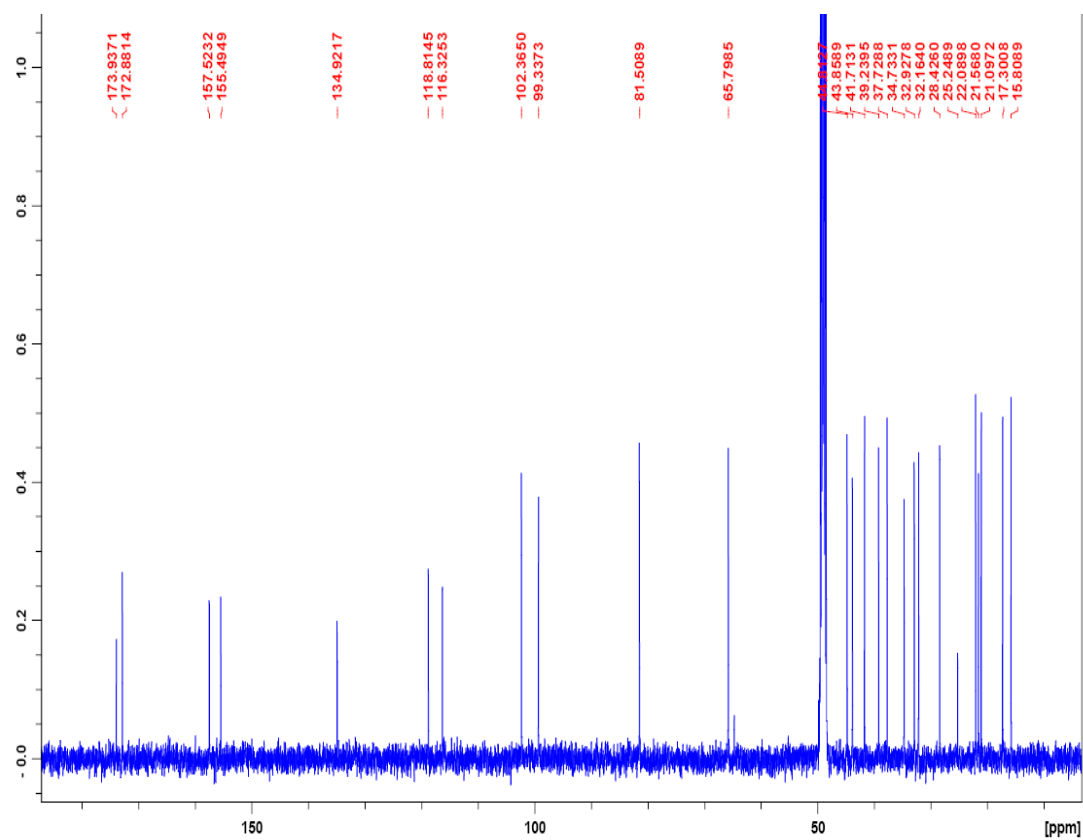

**Figure S45.** DEPT in CD<sub>3</sub>OD for compound **6**.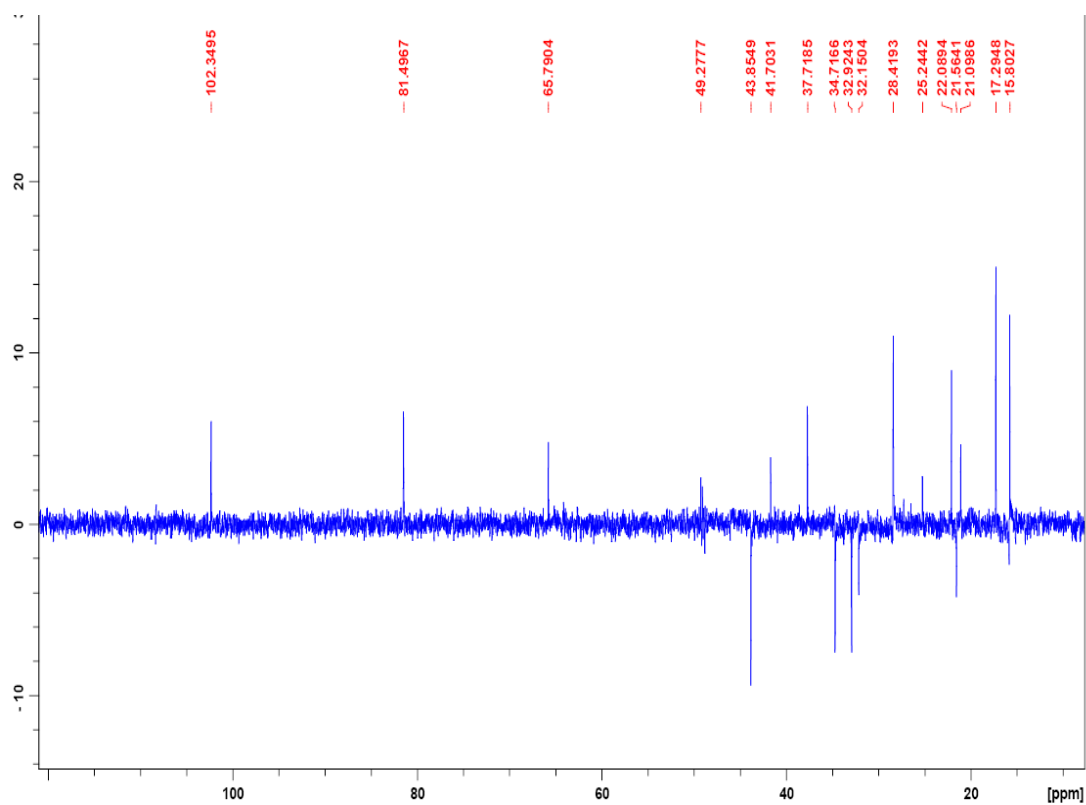**Figure S46.** COSY in CD<sub>3</sub>OD for compound **6**.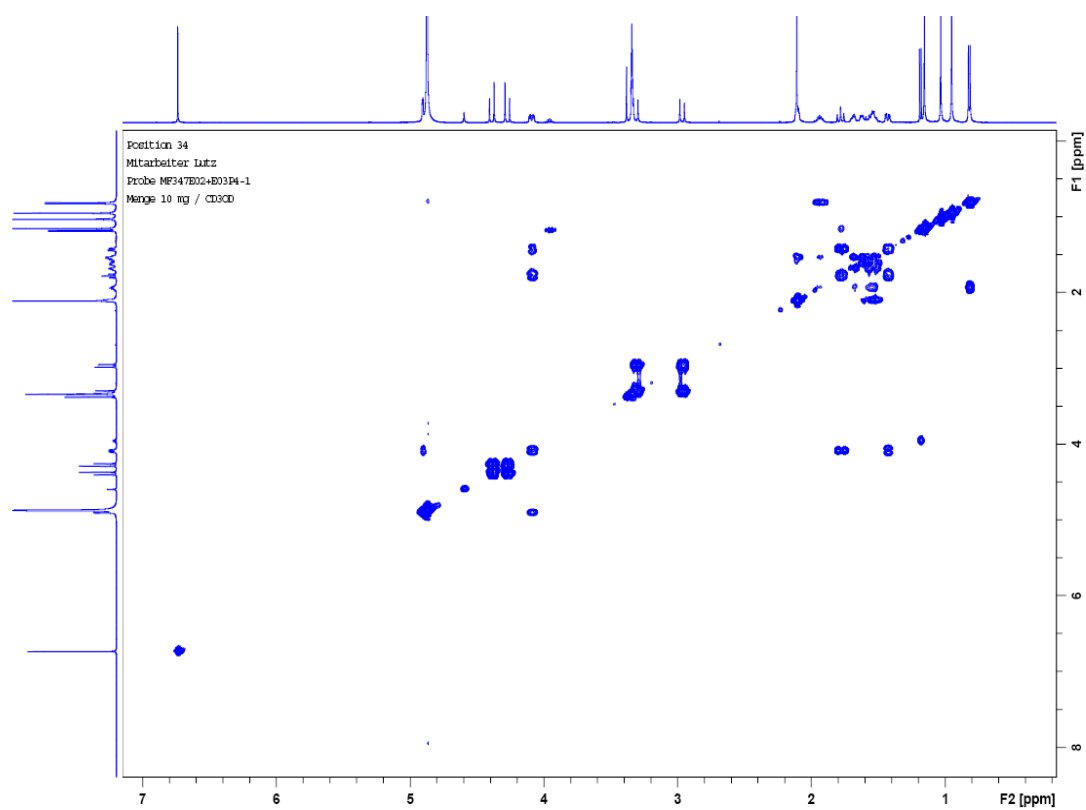

**Figure S47.** HSQC in CD<sub>3</sub>OD for compound **6**.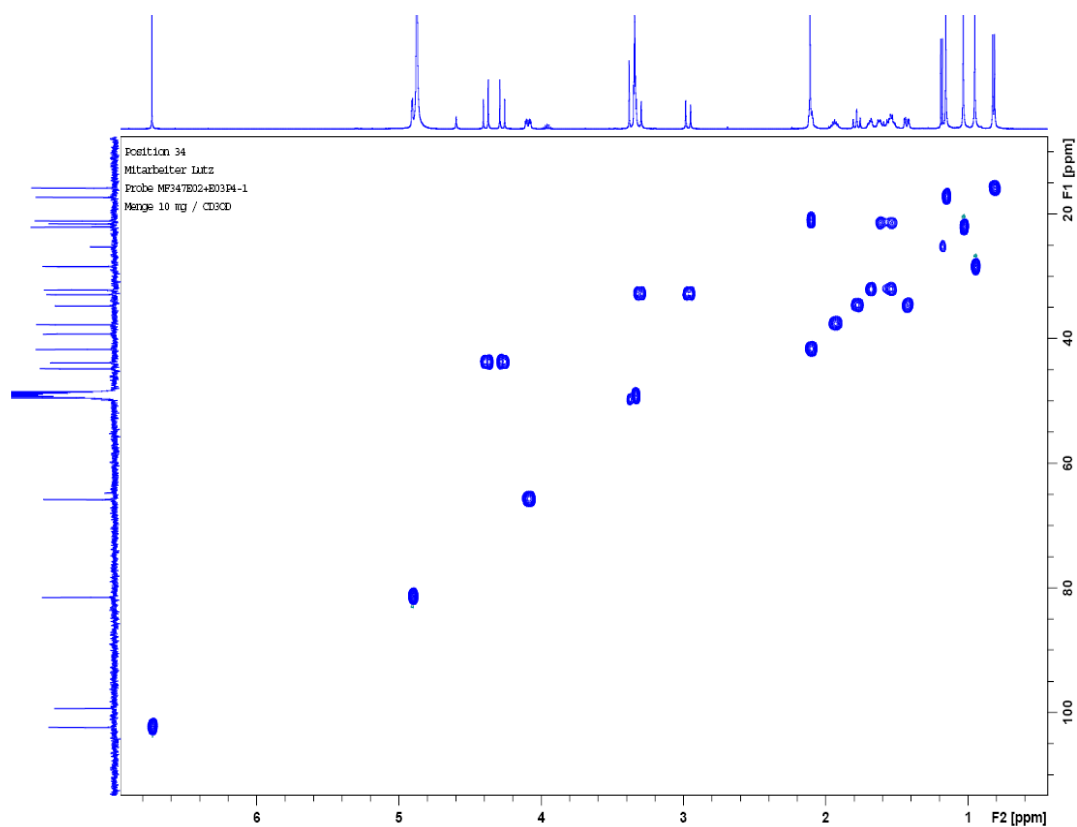**Figure S48.** HMBC in CD<sub>3</sub>OD for compound **6**.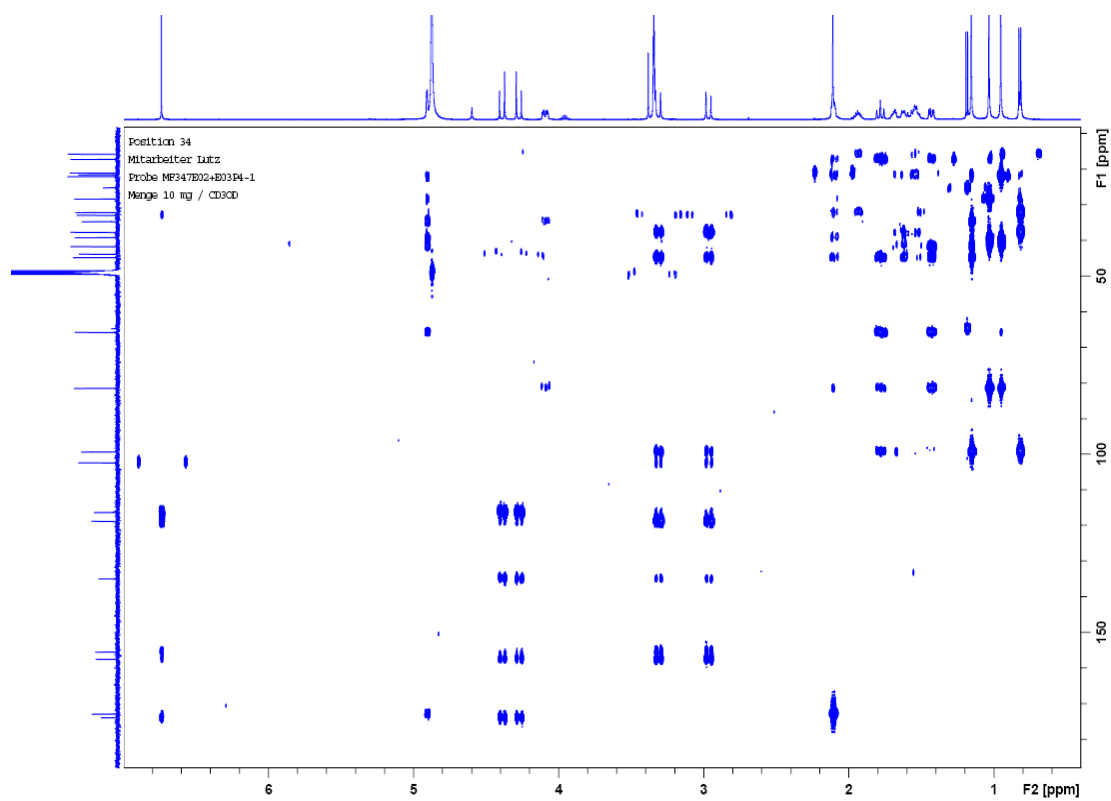

**Figure S49.** HMBC-2 in CD<sub>3</sub>OD for compound 6.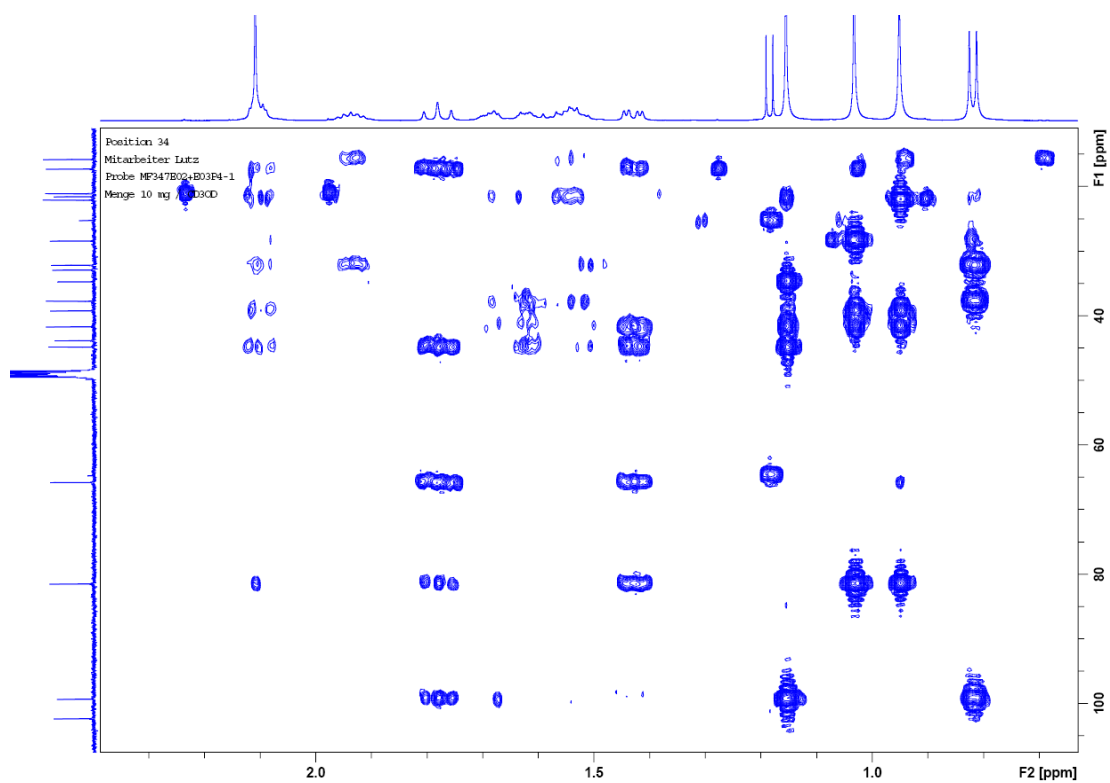**Figure S50.** NOESY in CD<sub>3</sub>OD for compound 6.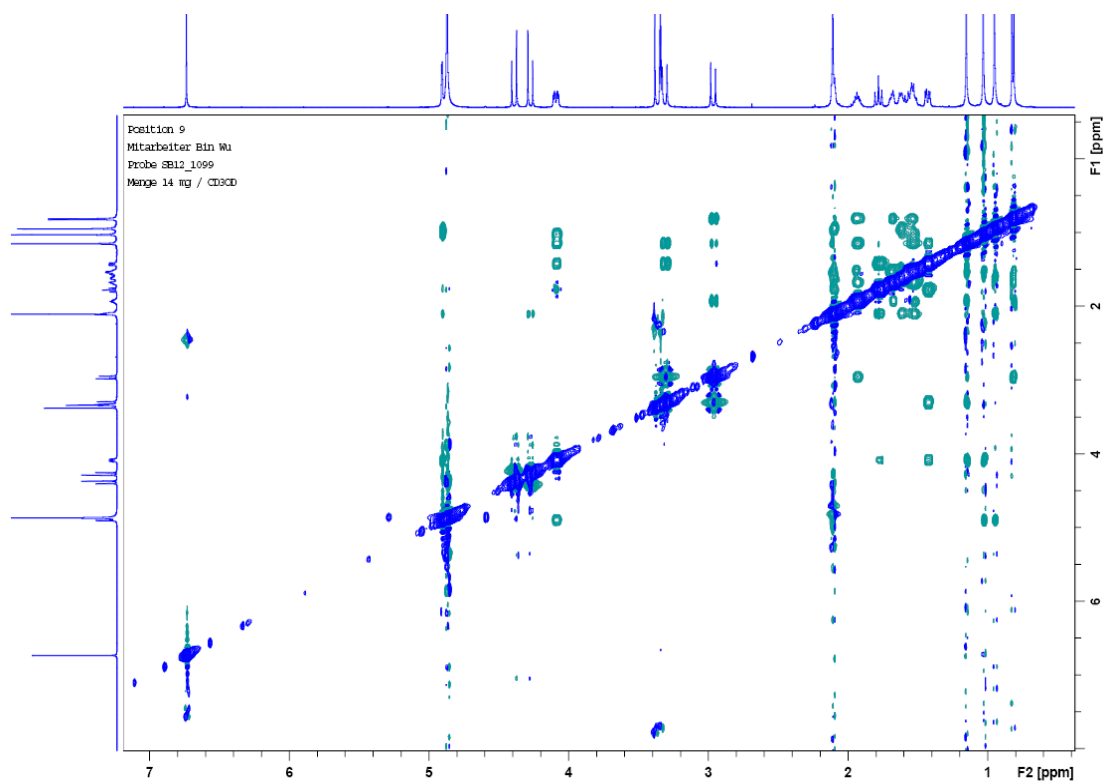

**Figure S51.** NOESY-2 in CD<sub>3</sub>OD for compound **6**.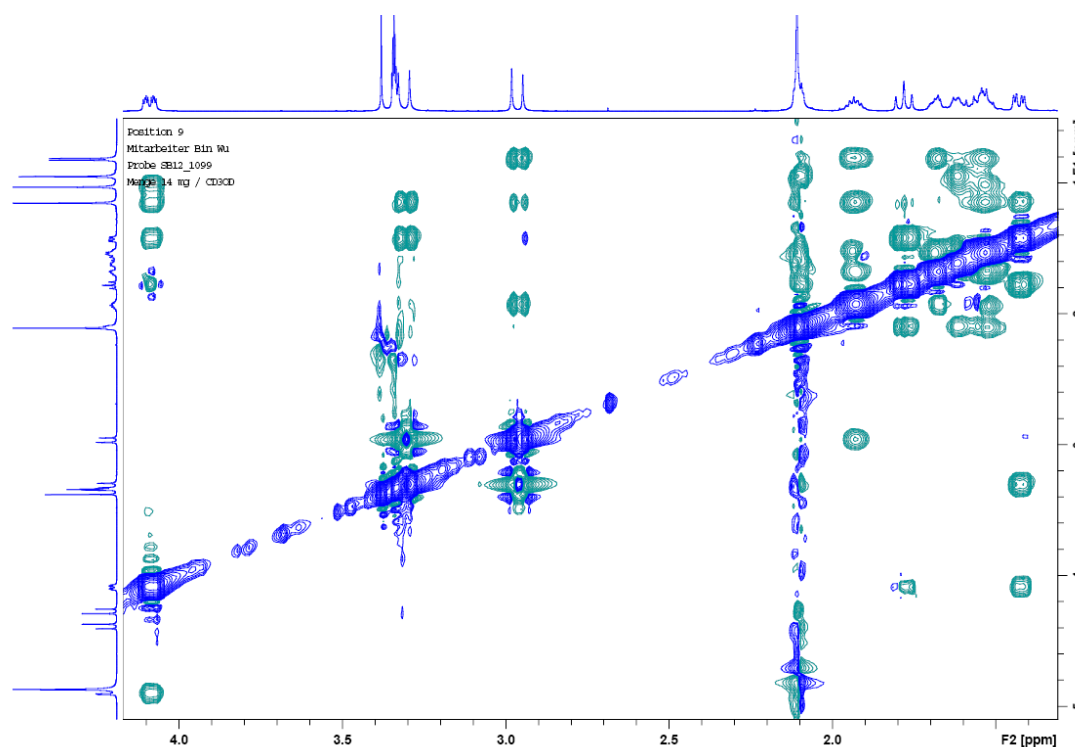**Figure S52.** HR-TOF-MS for compound **1**.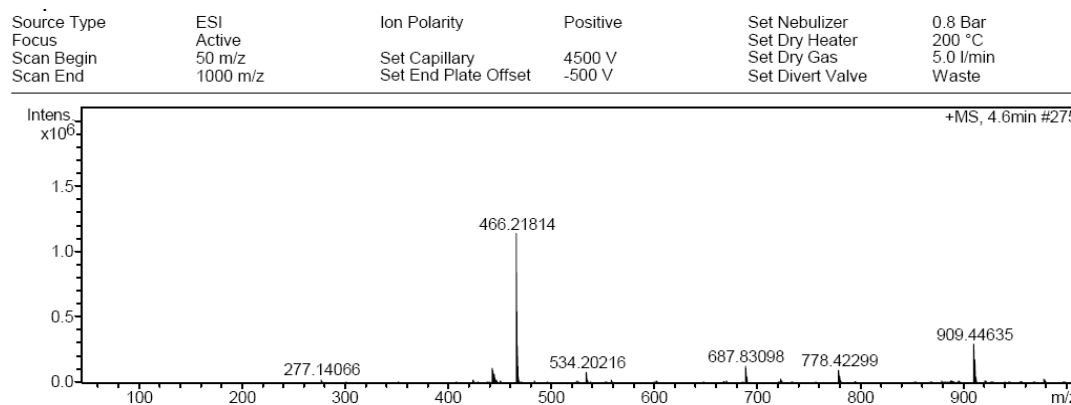**Figure S53.** HR-TOF-MS for compound **2**.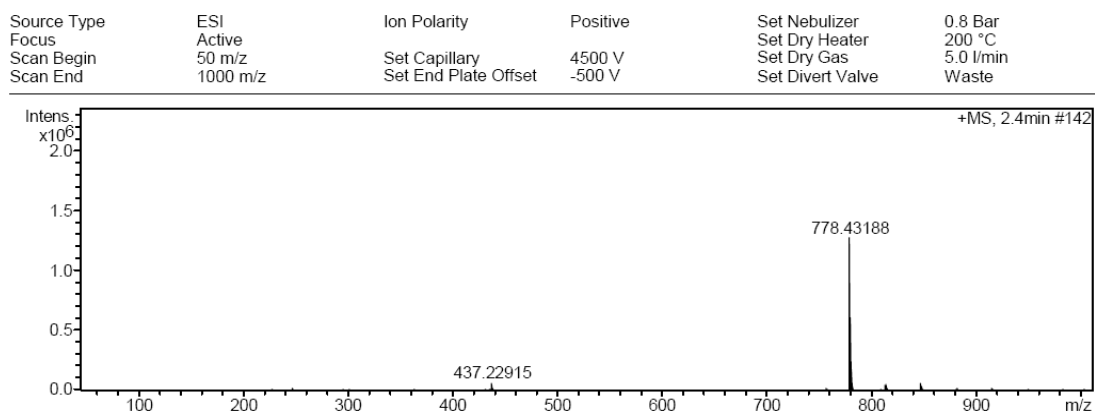

**Figure S54. HR-TOF-MS for compound 3.****Acquisition Parameter**

|             |          |                      |          |                  |           |
|-------------|----------|----------------------|----------|------------------|-----------|
| Source Type | ESI      | Ion Polarity         | Positive | Set Nebulizer    | 0.8 Bar   |
| Focus       | Active   |                      |          | Set Dry Heater   | 200 °C    |
| Scan Begin  | 50 m/z   | Set Capillary        | 4500 V   | Set Dry Gas      | 5.0 l/min |
| Scan End    | 1000 m/z | Set End Plate Offset | -500 V   | Set Divert Valve | Waste     |

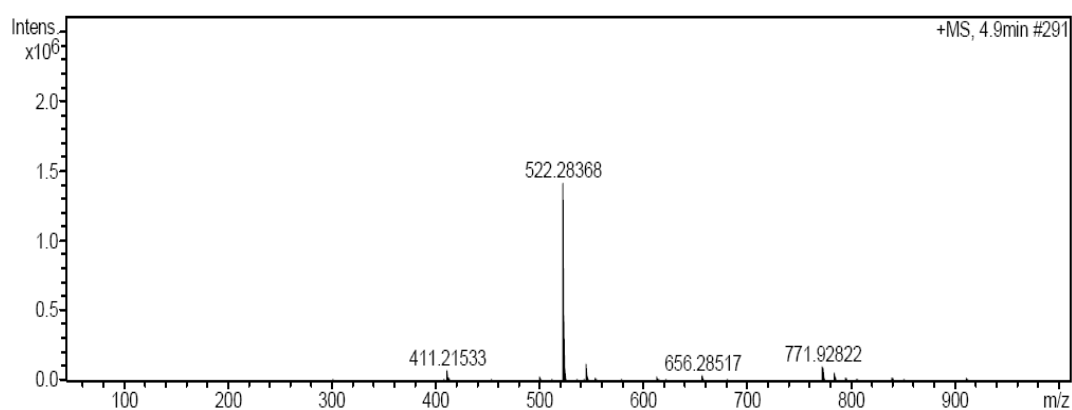**Figure S55. HR-TOF-MS for compound 4.****Acquisition Parameter**

|             |          |                      |          |                  |           |
|-------------|----------|----------------------|----------|------------------|-----------|
| Source Type | ESI      | Ion Polarity         | Positive | Set Nebulizer    | 0.8 Bar   |
| Focus       | Active   |                      |          | Set Dry Heater   | 200 °C    |
| Scan Begin  | 50 m/z   | Set Capillary        | 4500 V   | Set Dry Gas      | 5.0 l/min |
| Scan End    | 1000 m/z | Set End Plate Offset | -500 V   | Set Divert Valve | Waste     |

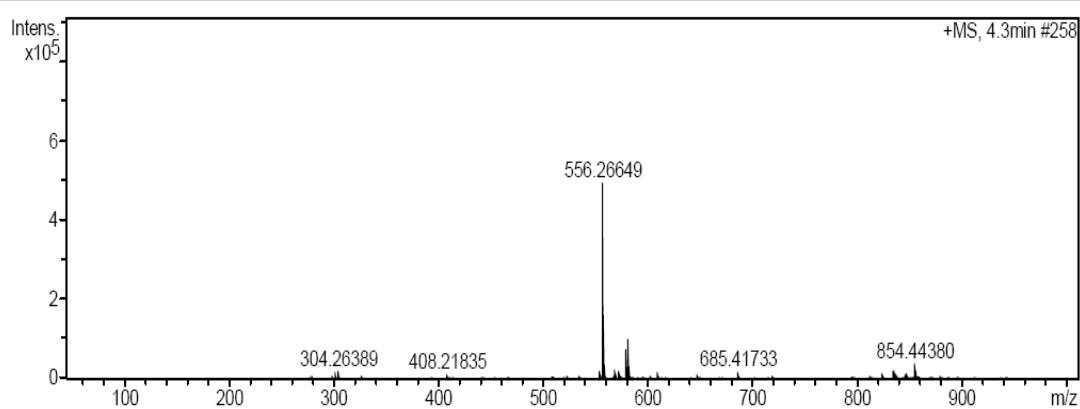**Figure S56. HR-TOF-MS for compound 5.**

|             |          |                      |          |                  |           |
|-------------|----------|----------------------|----------|------------------|-----------|
| Source Type | ESI      | Ion Polarity         | Positive | Set Nebulizer    | 0.8 Bar   |
| Focus       | Active   |                      |          | Set Dry Heater   | 200 °C    |
| Scan Begin  | 50 m/z   | Set Capillary        | 4500 V   | Set Dry Gas      | 5.0 l/min |
| Scan End    | 1000 m/z | Set End Plate Offset | -500 V   | Set Divert Valve | Waste     |

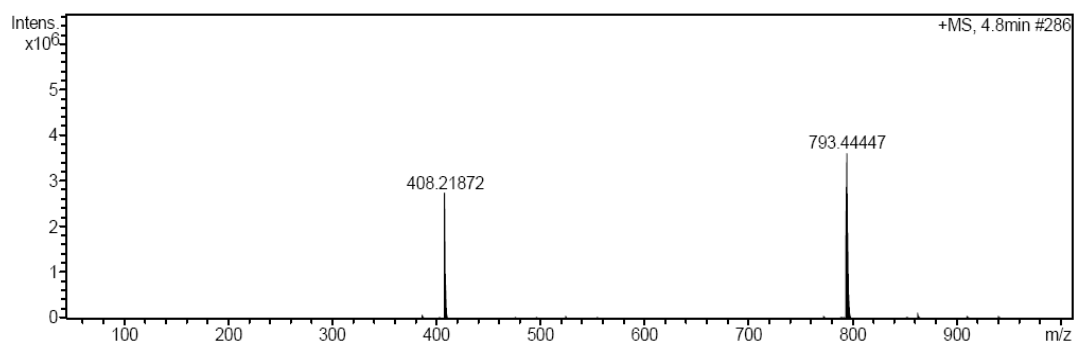

**Figure S57.** HR-TOF-MS for compound **6**.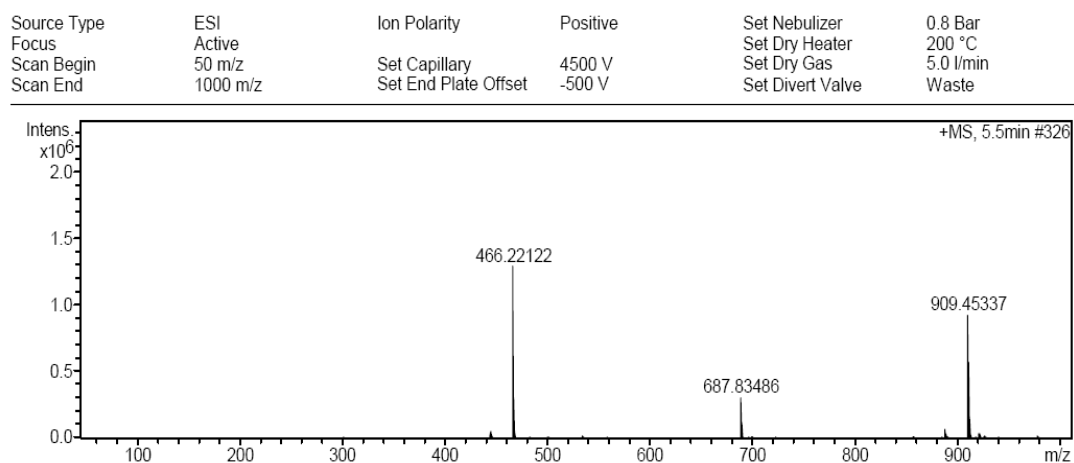

© 2014 by the authors; licensee MDPI, Basel, Switzerland. This article is an open access article distributed under the terms and conditions of the Creative Commons Attribution license (<http://creativecommons.org/licenses/by/3.0/>).
